# Supplementary material for: Asymptomatic bacteriuria in pregnancy: systematic reviews of screening and treatment effectiveness and patient preferences
Source: PubMed Central journal article supplement — BMJ Open. 2019 Mar 13;9(3):e021347. doi: 10.1136/bmjopen-2017-021347 (PMC6429717; doi:10.1136/bmjopen-2017-021347), 2019-03-13
Supplement: bmjopen-2017-021347supp002.pdf [file bmjopen-2017-021347supp002.pdf]

## Supplement 2. Search Strategy

### KQ1: Screening Effectiveness

Database: Ovid MEDLINE(R) Epub Ahead of Print, In-Process & Other Non-Indexed Citations, Ovid MEDLINE(R) Daily and Ovid MEDLINE(R) 1946 to Present

Date Searched: 13 June 2016

Date Updated: 6 September 2017

Records Retrieved: 1437

1. Asymptomatic Infections/ and (bacteriuria\* or bladder\* or cystitis\* or kidney\* or pyelo-cystiti\* or pyelocystiti\* or pyelo-nephriti\* or pyelonephriti\* or urin\* or UTI\*).mp.
2. Bacteriuria/
3. exp Cystitis/
4. Dysuria/
5. Pyelonephritis/
6. Urinary Tract Infections/
7. bacilluria\*.tw,kf.
8. bacteriuria\*.tw,kf.
9. cystiti\*.tw,kf.
10. (cysto-pyeliti\* or cystopyeliti\*).tw,kf.
11. dysuria\*.tw,kf.
12. (infection\* adj2 (bladder\* or genitourin\* or kidney\* or urin\* or urogenita\*)).tw,kf.
13. (pyelo-cystiti\* or pyelocystiti\*).tw,kf.
14. (pyelo-nephriti\* or pyelonephriti\*).tw,kf.
15. (UTI or UTIs).tw,kf.
16. or/1-15 [Combined MeSH & text words for bacteriuria]
17. Antibody-Coated Bacteria Test, Urinary/
18. \*Bacteriuria/di, pc, mi, ur
19. exp \*Cystitis/di, pc, mi, ur
20. Mass Screening/
21. Microbial Sensitivity Tests/
22. Microscopy/
23. Predictive Value of Tests/
24. \*Pyelonephritis/di, pc, mi, ur
25. Reagent Kits, Diagnostic/
26. Reagent Strips/
27. "Sensitivity and Specificity"/
28. Urinalysis/
29. \*Urinary Tract Infections/di, pc, mi, ur
30. ((accurac\* or diagnostic) adj5 (algorithm\* or test\*)).tw,kf.
31. diagnostic accurac\*.tw,kf.
32. culture\*.tw,kf.
33. (detect\* or predict\* or screen\*).tw,kf.
34. (dip slide\* or dipslide\* or dip stick\* or dipstick\*).tw,kf.
35. (micro-scopy or microscopy).tw,kf.
36. (microb\* adj2 test\*).tw,kf.
37. ((re-agent\* or reagent) adj3 (strip\* or test\*)).tw,kf.
38. strip\* test\*.tw,kf.

39. urine test\*.tw,kf.
40. (urinalys\* or urine analys\*).tw,kf.
41. uriscreen.tw,kf.
42. or/17-41 [Combined MeSH & text words for screening]
43. exp Pregnancy/
44. Pregnancy Complications, Infectious/
45. Pregnant Women/
46. Prenatal Care/
47. Prenatal Diagnosis/
48. (antenatal\* or pre-natal\* or prenatal\*).mp.
49. (expect\* adj (female? or mother? or wom#n)).tw,kf.
50. pregnan\*.mp.
51. or/43-50 [Combined MeSH & text words for pregnancy]
52. and/16,42,51 [Combined searches for bacteriuria, screening & pregnancy]
53. Male/ not (Female/ and Male/)
54. 52 not 53 [Male only records excluded]
55. exp Animals/ not (exp Animals/ and Humans/)
56. 54 not 55 [Animal only records excluded]
57. (comment or editorial or news or newspaper article).pt.
58. (letter not (letter and randomized controlled trial)).pt.
59. 56 not (57 or 58) [Opinion pieces excluded]
60. case reports.pt.
61. 59 not 60 [Case reports excluded]
62. limit 61 to (english or french)
63. remove duplicates from 62

### **KQ1: Screening Effectiveness**

**Database: Ovid Embase 1974 to 2016 Week 24**

Date Searched: 13 June 2016

Date Updated: 6 September 2017

Records Retrieved: 1613

1. acute pyelonephritis/
2. asymptomatic bacteriuria/
3. asymptomatic infection/ and (bacteriuria\* or bladder\* or cystitis\* or kidney\* or pyelo-cystiti\* or pyelocystiti\* or pyelo-nephriti\* or pyelonephriti\* or urin\* or UTI\*).mp.
4. bacteriuria/
5. exp cystitis/
6. dysuria/
7. kidney infection/
8. pyelonephritis/
9. urinary tract infections/
10. bacilluria\*.tw.
11. bacteriuria\*.tw.
12. cystiti\*.tw.
13. (cysto-pyeliti\* or cystopyeliti\*).tw.
14. dysuria\*.tw.

15. (infection\* adj2 (bladder\* or genitourin\* or kidney\* or urin\* or urogenita\*)).tw.
16. (pyelo-cystiti\* or pyelocystiti\*).tw.
17. (pyelo-nephriti\* or pyelonephriti\*).tw.
18. (UTI or UTIs).tw.
19. or/1-18 [Combined Emtree & text words for bacteriuria]
20. \*asymptomatic bacteriuria/di, pc
21. \*acute pyelonephritis/di, pc
22. \*bacteriuria/di, pc
23. exp \*cystitis/di, pc
24. diagnostic kit/
25. fluorescent antibody technique/
26. \*kidney infection/di, pc
27. mass screening/
28. microbial sensitivity test/
29. microscopy/
30. predictive value/
31. \*pyelonephritis/di, pc
32. "sensitivity and specificity"/
33. screening/
34. test strip/
35. exp urinalysis/
36. \*urinary tract infection/di, pc
37. ((accurac\* or diagnostic) adj5 (algorithm\* or test\*)).tw.
38. diagnostic accurac\*.tw.
39. culture\*.tw.
40. (detect\* or predict\* or screen\*).tw.
41. (dip slide\* or dipslide\* or dip stick\* or dipstick\*).tw.
42. (micro-scopy or microscopy).tw.
43. (microb\* adj2 test\*).tw.
44. ((re-agent\* or reagent) adj3 (strip\* or test\*)).tw.
45. strip\* test\*.tw.
46. urine test\*.tw.
47. (urinalys\* or urine analys\*).tw.
48. uriscreen.tw.
49. or/20-48 [Combined Emtree & text words for screening]
50. exp pregnancy/
51. pregnancy complication/
52. pregnant woman/
53. prenatal care/
54. prenatal diagnosis/
55. prenatal screening/
56. (antenatal\* or pre-natal\* or prenatal\*).mp.
57. (expect\* adj (female? or mother? or wom#n)).tw.
58. pregnan\*.mp.
59. or/50-58 [Combined Emtree & text words for pregnancy]
60. and/19,49,59 [Combined Emtree & text words for pregnancy]
61. Male/ not (Female/ and Male/)
62. 60 not 61 [Male only records excluded]

63. animals/ not (animals/ and humans/)
64. 62 not 63 [Animal only records excluded]
65. (conference\* or editorial or letter).pt.
66. 64 not 65 [Excluded publication types – RF note: will search conference proceedings separately with different strategy]
67. case report/ or case report\*.ti.
68. 66 not 67 [Case reports excluded]
69. limit 68 to (english or french)
70. remove duplicates from 69

### **KQ1: Screening Effectiveness**

#### **Database: Wiley Cochrane Library**

Date Searched: 13 June 2016

Date Update: 6 September 2017

Records Retrieved: 11 in Cochrane Database of Systematic Reviews

Records Retrieved: 1 in Database of Abstracts of Reviews of Effects (DARE)

Records Retrieved: 112 in Cochrane Central Register of Controlled Trials (CENTRAL)

Records Retrieved: 1 in Health Technology Assessment Database

- #1 [mh ^"Asymptomatic Infections"] and (bacteriuria\* or bladder\* or cystitis\* or kidney\* or pyelo-cystiti\* or pyelocystiti\* or pyelo-nephriti\* or pyelonephriti\* or urin\* or UTI\*):ti,ab,kw
- #2 [mh ^Bacteriuria]
- #3 [mh Cystitis]
- #4 [mh ^Dysuria]
- #5 [mh ^Pyelonephritis]
- #6 [mh ^"Urinary Tract Infections"]
- #7 bacilluria\*:ti,ab,kw
- #8 bacteriuria\*:ti,ab,kw
- #9 cystiti\*:ti,ab,kw
- #10 (cysto-pyeliti\* or cystopyeliti\*):ti,ab,kw
- #11 dysuria\*:ti,ab,kw
- #12 (infection\* near/2 (bladder\* or genitourin\* or kidney\* or urin\* or urogenita\*)):ti,ab,kw
- #13 (pyelo-cystiti\* or pyelocystiti\*):ti,ab,kw
- #14 (pyelo-nephriti\* or pyelonephriti\*):ti,ab,kw
- #15 (UTI or UTIs):ti,ab,kw
- #16 {or #1-#15}
- #17 [mh ^"Antibody-Coated Bacteria Test, Urinary"]
- #18 [mh ^Bacteriuria [mj]/DI,PC,MI,UR]
- #19 [mh Cystitis [mj]/DI,PC,MI,UR]
- #20 [mh ^"Mass Screening"]
- #21 [mh ^"Microbial Sensitivity Tests"]
- #22 [mh ^Microscopy]
- #23 [mh ^"Predictive Value of Tests"]
- #24 [mh ^Pyelonephritis [mj]/DI,PC,MI,UR]
- #25 [mh "Reagent Kits, Diagnostic"]
- #26 [mh "Reagent Strips"]

- #27 [mh ^"Sensitivity and Specificity"]
- #28 [mh ^Urinalysis]
- #29 [mh ^"Urinary Tract Infections" [mj]/DI,PC,MI,UR]
- #30 ((accurac\* or diagnostic) near/5 (algorithm\* or test\*)):ti,ab,kw
- #31 "diagnostic accurac\*":ti,ab,kw
- #32 culture\*:ti,ab,kw
- #33 (detect\* or predict\* or screen\*):ti,ab,kw
- #34 ("dip slide\*" or dipslide\* or "dip stick\*" or dipstick\*):ti,ab,kw
- #35 (micro-scopy or microscopy):ti,ab,kw
- #36 (microb\* near/2 test\*):ti,ab,kw
- #37 ((re-agent\* or reagent) near/3 (strip\* or test\*)):ti,ab,kw
- #38 "strip\* test\*":ti,ab,kw
- #39 "urine test\*":ti,ab,kw
- #40 (urinalys\* or "urine analys\*"):ti,ab,kw
- #41 uriscreen:ti,ab,kw
- #42 {or #17-#41}
- #43 [mh Pregnancy]
- #44 [mh ^"Pregnancy Complications, Infectious"]
- #45 [mh ^"Pregnant Women"]
- #46 [mh ^"Prenatal Care"]
- #47 [mh ^"Prenatal Diagnosis"]
- #48 (antenatal\* or pre-natal\* or prenatal\*):ti,ab,kw
- #49 (expect\* near/1 (female\* or mother\* or wom?n)):ti,ab,kw
- #50 pregnan\*:ti,ab,kw
- #51 {or #43-#50}
- #52 {and #16, #42, #51}

### **KQ1: Screening Effectiveness**

**Database: CINAHL Plus with Full Text (1937 to the present) via EBSCOhost**

Date Searched: 13 June 2016

Date Updated: 6 September 2017

Records Retrieved: 249

- S1. (MH "Bacteriuria")
- S2. (MH "Cystitis+")
- S3. (MH "Dysuria")
- S4. (MH "Pyelonephritis")
- S5. (MH "Urinary Tract Infections")
- S6. bacilluria\*
- S7. bacteriuria\*
- S8. cystiti\*
- S9. "cysto-pyeliti\*" or cystopyeliti\*
- S10. dysuria\*
- S11. (infection\* N2 (bladder\* or genitourin\* or kidney\* or urin\* or urogenita\*))
- S12. "pyelo-cystiti\*" or pyelocystiti\*
- S13. "pyelo-nephriti\*" or pyelonephriti\*
- S14. UTI or UTIs

S15. S1 OR S2 OR S3 OR S4 OR S5 OR S6 OR S7 OR S8 OR S9 OR S10 OR S11 OR S12 OR S13 OR S14  
 S16. (MM "Bacteriuria/DI/PC/MI/UR")  
 S17. (MM "Cystitis+/DI/MI/PC/UR")  
 S18. (MH "Fluorescent Antibody Technique")  
 S19. (MH "Health Screening")  
 S20. (MH "Microbial Culture and Sensitivity Tests")  
 S21. (MH "Microscopy")  
 S22. (MH "Predictive Value of Tests")  
 S23. (MM "Pyelonephritis/DI/PC/MI/UR")  
 S24. (MH "Reagent Kits, Diagnostic+")  
 S25. (MH "Sensitivity and Specificity")  
 S26. (MH "Urinalysis")  
 S27. (MM "Urinary Tract Infections/DI/PC/MI/UR")  
 S28. (accurac\* or diagnostic) N5 (algorithm\* or test\*)  
 S29. "diagnostic accurac\*"

S30. culture\*  
 S31. detect\* or predict\* or screen\*  
 S32. "dip slide\*" or dipslide\* or "dip stick\*" or dipstick\*  
 S33. "micro-scopy" or microscopy  
 S34. microb\* N2 test\*  
 S35. ("re-agent\*" or reagent) N3 (strip\* or test\*)  
 S36. "strip\* test\*"

S37. "urine test\*"

S38. urinalys\* or "urine analys\*"

S39. uriscreen

S40. S16 OR S17 OR S18 OR S19 OR S20 OR S21 OR S22 OR S23 OR S24 OR S25 OR S26 OR S27 OR S28  
 OR S29 OR S30 OR S31 OR S32 OR S33 OR S34 OR S35 OR S36 OR S37 OR S38 OR S39

S41. (MH "Expectant Mothers")  
 S42. (MH "Pregnancy+")  
 S43. (MH "Pregnancy Complications, Infectious")  
 S44. (MH "Prenatal Care")  
 S45. (MH "Prenatal Diagnosis")  
 S46. antenatal\* or "pre-natal\*" or prenatal\*  
 S47. expect\* N1 (female? or mother? or wom?n)  
 S48. pregnan\*

S49. S41 OR S42 OR S43 OR S44 OR S45 OR S46 OR S47 OR S48

S50. S15 AND S40 AND S49

S51. MH "Male" NOT ((MH "Female") AND (MH "Male"))

S52. S50 NOT S51

S53. ((MH "Vertebrates+") NOT MH Human)

S54. S52 NOT S53

S55. Limiters - Publication Type: Anecdote, Case Study, Commentary, Editorial, Letter

S56. S54 NOT S55

S57. S56 Narrow by Language: - english [RF: No French records in results to include]

### **KQ1: Screening Effectiveness**

**Database: PubMed via NCBI Entrez (1946 to Present)**

Date Searched: 14 June 2016

Records Retrieved: 1246

(((((("asymptomatic infections"[mh] AND (("bacteriuria"[MeSH Terms] OR "bacteriuria"[All Fields]) OR ("bacteriuria"[MeSH Terms] OR "bacteriuria"[All Fields] OR "bacteriurias"[All Fields]) OR ("urinary bladder"[MeSH Terms] OR ("urinary"[All Fields] AND "bladder"[All Fields]) OR "urinary bladder"[All Fields] OR "bladder"[All Fields]) OR ("cystitis"[MeSH Terms] OR "cystitis"[All Fields]) OR ("kidney"[MeSH Terms] OR "kidney"[All Fields]) OR ("kidney"[MeSH Terms] OR "kidney"[All Fields] OR "kidneys"[All Fields]) OR ("pyelocystitis"[MeSH Terms] OR "pyelocystitis"[All Fields]) OR ("pyelonephritis"[MeSH Terms] OR "pyelonephritis"[All Fields]) OR ("urinary tract"[MeSH Terms] OR ("urinary"[All Fields] AND "tract"[All Fields]) OR "urinary tract"[All Fields] OR "urinary"[All Fields]) OR ("urine"[Subheading] OR "urine"[All Fields] OR "urine"[MeSH Terms]) OR UTI[all] OR ("urinary tract infections"[MeSH Terms] OR ("urinary"[All Fields] AND "tract"[All Fields] AND "infections"[All Fields]) OR "urinary tract infections"[All Fields] OR "utis"[All Fields]))) OR "bacteriuria"[MeSH Terms:noexp] OR "cystitis"[MeSH Terms] OR "dysuria"[MeSH Terms:noexp] OR "pyelonephritis"[MeSH Terms:noexp] OR "Urinary Tract Infections"[mh:noexp] OR bacilluria[tiab] OR bacteriuria[tiab] OR bacteriurias[tiab] OR "bladder infection"[tiab] OR "bladder infections"[tiab] OR cystitis[tiab] OR cystopyelitis[tiab] OR dysuria[tiab] OR "genito-urinary infection"[tiab] OR "genitourinary infection"[tiab] OR "genito-urinary infections"[tiab] OR "genitourinary infections"[tiab] OR "kidney infection"[tiab] OR "kidney infections"[tiab] OR "pyelo-nephritis"[tiab] OR pyelocystitis[tiab] OR pyelonephritis[tiab] OR "urinary infection"[tiab] OR "urinary infections"[tiab] OR "urogenital infection"[tiab] OR "urogenital infections"[tiab] OR UTI[tiab] OR UTIs[tiab]) AND ("Antibody-Coated Bacteria Test, Urinary"[mh] OR "Bacteriuria/diagnosis"[Majr] OR "Bacteriuria/prevention and control"[Majr] OR ("bacteriuria/microbiology"[Mesh Terms] AND Majr[All Fields]) OR "Bacteriuria/urine"[Majr] OR "Cystitis/diagnosis"[Majr] OR "Cystitis/prevention and control"[Majr] OR "Cystitis/microbiology"[Majr] OR "Cystitis/urine"[Majr] OR "Mass Screening"[mh:noexp] OR "Microbial Sensitivity Tests"[mh:noexp] OR "Microscopy"[mh:noexp] OR "Predictive Value of Tests"[mh:noexp] OR "Pyelonephritis/diagnosis"[Majr] OR "Pyelonephritis/prevention and control"[Majr] OR "Pyelonephritis/microbiology"[Majr] OR "Pyelonephritis/urine"[Majr] OR "Reagent Kits, Diagnostic"[mh:noexp] OR "Reagent Strips"[mh:noexp] OR "Sensitivity and Specificity"[mh:noexp] OR "Urinalysis"[mh:noexp] OR "Urinary Tract Infections/diagnosis"[Majr] OR "Urinary Tract Infections/prevention and control"[Majr] OR "Urinary Tract Infections/microbiology"[Majr] OR "Urinary Tract Infections/urine"[Majr] OR detect[tiab] OR detected[tiab] OR detection[tiab] OR detecting[tiab] OR detects[tiab] OR "diagnostic accuracy"[tiab] OR "diagnostic algorithm"[tiab] OR "dip slide"[tiab] OR "dip slides"[tiab] OR "dip stick"[tiab] OR "dip sticks"[tiab] OR dipslide[tiab] OR dipslides[tiab] OR dipstick[tiab] OR dipsticks[tiab] OR culture[tiab] OR cultures[tiab] OR "diagnostic test"[tiab] OR "diagnostic tests"[tiab] OR "microbial test"[tiab] OR "microbial tests"[tiab] OR microscopy[tiab] OR predict[tiab] OR predicted[tiab] OR prediction[tiab] OR predicting[tiab] OR predicts[tiab] OR "reagent strip"[tiab] OR "reagent strips"[tiab] OR "reagent test"[tiab] OR "reagent testing"[tiab] OR "reagent tests"[tiab] OR screen[tiab] OR screened[tiab] OR screening[tiab] OR screens[tiab] OR "strip test"[tiab] OR "strip tests"[tiab] OR "strip testing"[tiab] OR "test accuracy"[tiab] OR urinalyses[tiab] OR urinalysis[tiab] OR "urine analyses"[tiab] OR "urine analysis"[tiab] OR "urine test"[tiab] OR "urine tested"[tiab] OR "urine testing"[tiab] OR "urine tests"[tiab] OR uriscreen[tiab]) AND ("Pregnancy"[mh] OR "Pregnancy Complications, Infectious"[mh:noexp] OR "Pregnant Women"[mh:noexp] OR "Prenatal Care"[mh:noexp] OR "Prenatal Diagnosis"[mh:noexp] OR antenatal[tiab] OR "pre-natal"[tiab] OR prenatal[tiab] OR "expectant mother"[tiab] OR "expectant mothers"[tiab] OR "expecting mothers"[tiab] OR "expecting mothers"[tiab] OR "expectant woman"[tiab] OR "expectant women"[tiab] OR "expecting

women"[tiab] OR pregnancies[tiab] OR pregnancy[tiab] OR pregnant[tiab])) NOT ("Male"[mh] NOT ("Female"[mh] AND "Male"[mh])) NOT (((Animals[MESH] OR Animal Experimentation[MESH] OR "Models, Animal"[MESH] OR Vertebrates[MESH]) NOT (Humans[MESH] OR Human experimentation[MESH])) OR (((animals[tiab] OR animal model[tiab] OR rat[tiab] OR rats[tiab] OR mouse[tiab] OR mice[tiab] OR rabbit[tiab] OR rabbits[tiab] OR pig[tiab] OR pigs[tiab] OR porcine[tiab] OR swine[tiab] OR dog[tiab] OR dogs[tiab] OR hamster[tiab] OR hamsters[tiab] OR chicken[tiab] OR chickens[tiab] OR sheep[tiab]) AND (publisher[sb] OR inprocess[sb] OR pubmednotmedline[sb])) NOT (human[ti] OR humans[ti] OR people[ti] OR children[ti] OR adults[ti] OR seniors[ti] OR patient[ti] OR patients[ti]))) NOT (case reports[pt] OR comment[pt] OR editorial[pt] OR letter[pt] OR newspaper article[pt])

> limit to English or French

## **KQ2: Women's Outcome Valuation**

**Database: Ovid MEDLINE(R) Epub Ahead of Print, In-Process & Other Non-Indexed Citations, Ovid MEDLINE(R) Daily and Ovid MEDLINE(R) 1946 to Present**

Date Searched: 4 July 2016

Date Updated: 5 September 2017

Records Retrieved: 2965

1. Asymptomatic Infections/ and (bacteriuria\* or bladder\* or cystitis\* or kidney\* or pyelo-cystiti\* or pyelocystiti\* or pyelo-nephriti\* or pyelonephriti\* or urin\* or UTI\*).mp.
2. Bacteriuria/
3. exp Cystitis/
4. Dysuria/
5. Pyelonephritis/
6. Urinary Tract Infections/
7. bacilluria\*.tw,kf.
8. bacteriuria\*.tw,kf.
9. cystiti\*.tw,kf.
10. (cysto-pyeliti\* or cystopyeliti\*).tw,kf.
11. dysuria\*.tw,kf.
12. (infection\* adj2 (bladder\* or genitourin\* or kidney\* or urin\* or urogenita\*)).tw,kf.
13. (pyelo-cystiti\* or pyelocystiti\*).tw,kf.
14. (pyelo-nephriti\* or pyelonephriti\*).tw,kf.
15. (UTI or UTIs).tw,kf.
16. or/1-15 [Combined MeSH & text words for bacteriuria]
17. Antibody-Coated Bacteria Test, Urinary/
18. \*Bacteriuria/di, pc, mi, ur
19. exp \*Cystitis/di, pc, mi, ur
20. Mass Screening/
21. Microbial Sensitivity Tests/
22. Microscopy/
23. Predictive Value of Tests/
24. \*Pyelonephritis/di, pc, mi, ur
25. Reagent Kits, Diagnostic/
26. Reagent Strips/
27. "Sensitivity and Specificity"/



28. Urinalysis/
29. \*Urinary Tract Infections/di, pc, mi, ur
30. ((accurac\* or diagnostic) adj5 (algorithm\* or test\*)).tw,kf.
31. diagnostic accurac\*.tw,kf.
32. culture\*.tw,kf.
33. (detect\* or predict\* or screen\*).tw,kf.
34. (dip slide\* or dipslide\* or dip stick\* or dipstick\*).tw,kf.
35. (micro-scopy or microscopy).tw,kf.
36. (microb\* adj2 test\*).tw,kf.
37. ((re-agent\* or reagent) adj3 (strip\* or test\*)).tw,kf.
38. strip\* test\*.tw,kf.
39. urine test\*.tw,kf.
40. (urinalys\* or urine analys\*).tw,kf.
41. uriscreen.tw,kf.
42. or/17-41 [Combined MeSH & text words for screening]
43. and/16,42 [Combined searches for ASB and screening]
44. Anti-Bacterial Agents/
45. Antibiotic Prophylaxis/
46. Anti-Infective Agents, Urinary/
47. Asymptomatic Infections/dt, th
48. \*Bacteriuria/dt, th
49. Drug Therapy, Combination/
50. Norfloxacin/
51. exp Penicillins/
52. exp Sulfonamides/
53. \*Urinary Tract Infections/dt, th
54. amoxicillin\*.mp.
55. ampicillin\*.mp.
56. (anti-bacteria\* or antibacteria\*).tw,kf.
57. (anti-biotic\* or antibiotic\*).tw,kf.
58. aztreonam\*.mp.
59. cefadroxil\*.mp.
60. cefepime\*.mp.
61. ceftibuten\*.mp.
62. ceftri?xone\*.mp.
63. cefuroxime\*.mp.
64. cephalixin\*.mp.
65. cephalosporin\*.mp.
66. cephradine\*.mp.
67. clindamycin\*.mp.
68. (co-trimoxazole\* or cotrimoxazole\*).mp.
69. cycloserine\*.mp.
70. fosfomycin\*.mp.
71. gentam#cin\*.mp.
72. nalidixic acid\*.mp.
73. nitrofurantoin\*.mp.
74. penicillin\*.mp.
75. piperacillin\*.mp.

76. pivampicillin\*.mp.
77. pivmecillinam\*.mp.
78. sulfadimethoxine\*.mp.
79. sulfadiazine\*.mp.
80. sulfamethizole\*.mp.
81. sulfamethoxazole\*.mp.
82. sulfamethoxypyridazine\*.mp.
83. sulfonamide\*.mp.
84. sulphadimidine\*.mp.
85. sulphonamide\*.mp.
86. tetracycline\*.mp.
87. vancomycin\*.mp.
88. or/44-87 [Combined MeSH & text words for antibiotic treatment]
89. exp Pregnancy/
90. Pregnancy Complications, Infectious/
91. Pregnant Women/
92. Prenatal Care/
93. Prenatal Diagnosis/
94. (antenatal\* or pre-natal\* or prenatal\*).mp.
95. (expect\* adj (female? or mother? or wom#n)).tw,kf.
96. pregnan\*.mp.
97. or/89-96 [Combined MeSH & text words for pregnancy]
98. and/88,97 [Combined searches for antibiotic treatment and pregnancy]
99. Choice Behavior/
100. \*Consumer Behavior/
101. exp Consumer Participation/
102. Cooperative Behavior/
103. exp Decision Making/
104. Focus Groups/
105. Health Care Surveys/
106. exp Informed Consent/
107. Interviews as Topic/
108. Patient Acceptance of Health Care/
109. exp Patient Education as Topic/
110. Patient Participation/
111. Patient Preference/
112. Social Values/
113. "Surveys and Questionnaires"/
114. Treatment Refusal/
115. (15D\* and (HRQoL or QoL or "quality of life")).mp.
116. ((accept\* or consider\* or choice? or choos\* or chose? or decid\* or decis\* or input\* or involv\* or opinion\* or participat\* or perceiv\* or percepti\* or perspective? or prefer\* or refus\* or respons\* or valuation or value? or valuing or view\*) adj3 (citizen? or client? or consumer? or female? or male? or men or patient? or public or stake?holder\* or user? or wom#n)).tw,kf.
117. ((analys#s or valuation? or value? or valuing) adj3 (conjoint or contingent)).tw,kf.
118. (choice? adj2 (behavio?r\* or discrete or experiment\*)).tw,kf.
119. ((choice? or choos\* or consent\* or decision\*) adj1 informed).tw,kf.

120. ((choice? or choos\* or decision\*) adj2 (made or make or makes or making or shar\* or support\*)).tw,kf.
121. (EQ 5D or EQ5D or EuroQoL 5D or EuroQoL5D).mp.
122. (focus group? or interview\* or questionnaire? or survey\*).tw,kf.
123. gambi\*.tw,kf.
124. health utilit\*.tw,kf.
125. HUI.tw,kf.
126. (multi?attribute or multi?criteria).tw,kf.
127. (preference? adj1 (elicit\* or scor\* or state\*)).tw,kf.
128. prospect theor\*.tw,kf.
129. (SF 12 or SF 36 or SF 6D or SF12 or SF36 or SF6D).mp.
130. (trade off? or tradeoff?).tw,kf.
131. (willing\* adj2 pay\*).tw,kf.
132. or/99-131 [Combined MeSH & text words for patient preferences & values]
133. and/43,132 [Combined searches for patient preferences & ASB screening]
134. and/98,132 [Combined searches for patient preferences & antibiotic treatment and pregnancy]
135. or/133-134 [Combined sets of patient preferences for ASB screening & patient preferences for antibiotic treatment in pregnancy]
136. Male/ not Female/
137. 135 not 136 [Male only records excluded]
138. exp Animals/ not (exp Animals/ and Humans/)
139. 137 not 138 [Animal only records excluded]
140. (comment or editorial or news or newspaper article).pt.
141. (letter not (letter and randomized controlled trial)).pt.
142. 139 not (140 or 141) [Opinion pieces excluded]
143. case reports.pt.
144. 142 not 143 [Case reports excluded]
145. limit 144 to (english or french)
146. remove duplicates from 145

## **KQ2: Women's Outcome Valuation**

**Database: Ovid Embase 1974 to 2016 Week 27**

Date Searched: 4 July 2016

Date Updated: 5 September 2017

Records Retrieved: 3922

1. acute pyelonephritis/
2. asymptomatic bacteriuria/
3. asymptomatic infection/ and (bacteriuria\* or bladder\* or cystitis\* or kidney\* or pyelo-cystiti\* or pyelocystiti\* or pyelo-nephriti\* or pyelonephriti\* or urin\* or UTI\*).mp.
4. bacteriuria/
5. exp cystitis/
6. dysuria/
7. kidney infection/
8. pyelonephritis/
9. urinary tract infections/
10. bacilluria\*.tw.

11. bacteriuria\*.tw.
12. cystiti\*.tw.
13. (cysto-pyeliti\* or cystopyeliti\*).tw.
14. dysuria\*.tw.
15. (infection\* adj2 (bladder\* or genitourin\* or kidney\* or urin\* or urogenita\*)).tw.
16. (pyelo-cystiti\* or pyelocystiti\*).tw.
17. (pyelo-nephriti\* or pyelonephriti\*).tw.
18. (UTI or UTIs).tw.
19. or/1-18 [Combined Emtree & text words for bacteriuria]
20. \*asymptomatic bacteriuria/di, pc
21. \*acute pyelonephritis/di, pc
22. \*bacteriuria/di, pc
23. exp \*cystitis/di, pc
24. diagnostic kit/
25. fluorescent antibody technique/
26. \*kidney infection/di, pc
27. mass screening/
28. microbial sensitivity test/
29. microscopy/
30. predictive value/
31. \*pyelonephritis/di, pc
32. "sensitivity and specificity"/
33. screening/
34. test strip/
35. exp urinalysis/
36. \*urinary tract infection/di, pc
37. ((accurac\* or diagnostic) adj5 (algorithm\* or test\*)).tw.
38. culture\*.tw.
39. (detect\* or predict\* or screen\*).tw.
40. diagnostic accurac\*.tw.
41. (dip slide\* or dipslide\* or dip stick\* or dipstick\*).tw.
42. (micro-scopy or microscopy).tw.
43. (microb\* adj2 test\*).tw.
44. ((re-agent\* or reagent) adj3 (strip\* or test\*)).tw.
45. strip\* test\*.tw.
46. urine test\*.tw.
47. (urinalys\* or urine analys\*).tw.
48. uriscreen.tw.
49. or/20-48 [Combined Emtree & text words for screening]
50. and/19,49 [Combined searches for ASB and screening]
51. antibiotic agent/
52. antibiotic prophylaxis/
53. antiinfective agent/
54. \*asymptomatic bacteriuria/dt, th
55. \*asymptomatic infection/dt, th
56. \*bacteriuria/dt, th
57. exp \*cystitis/dt, th
58. drug combination/

59. \*kidney infection/dt, th
60. norfloxacin/
61. penicillin derivative/
62. \*pyelonephritis/dt, th
63. sulfonamide/
64. urinary tract antiinfective agent/
65. \*urinary tract infection/dt, th
66. amoxicillin\*.mp.
67. ampicillin\*.mp.
68. (anti-bacteria\* or antibacteria\*).tw.
69. (anti-biotic\* or antibiotic\*).tw.
70. aztreonam\*.mp.
71. cefadroxil\*.mp.
72. cefepime\*.mp.
73. ceftibuten\*.mp.
74. ceftri?xone\*.mp.
75. cefuroxime\*.mp.
76. cephalexin\*.mp.
77. cephalosporin\*.mp.
78. cephradine\*.mp.
79. clindamycin\*.mp.
80. (co-trimoxazole\* or cotrimoxazole\*).mp.
81. cycloserine\*.mp.
82. fosfomicin\*.mp.
83. gentam#cin\*.mp.
84. nalidixic acid\*.mp.
85. nitrofurantoin\*.mp.
86. penicillin\*.mp.
87. piperacillin\*.mp.
88. pivampicillin\*.mp.
89. pivmecillinam\*.mp.
90. sulfadimethoxine\*.mp.
91. sulfadiazine\*.mp.
92. sulfamethizole\*.mp.
93. sulfamethoxazole\*.mp.
94. sulfamethoxypyridazine\*.mp.
95. sulfonamide\*.mp.
96. sulphadimidine\*.mp.
97. sulphonamide\*.mp.
98. tetracycline\*.mp.
99. vancomycin\*.mp.
100. or/51-99 [Combined Emtree & text words for antibiotic treatment]
101. exp pregnancy/
102. pregnancy complication/
103. pregnant woman/
104. prenatal care/
105. prenatal diagnosis/
106. prenatal screening/

107. (antenatal\* or pre-natal\* or prenatal\*).mp.
108. (expect\* adj (female? or mother? or wom#n)).tw.
109. pregnan\*.mp.
110. or/101-109 [Combined Emtree & text words for pregnancy]
111. and/100,110 [Combined searches for antibiotic treatment and pregnancy]
112. cooperation/
113. \*consumer attitude/
114. exp decision making/
115. health care survey/
116. informed consent/
117. exp interview/
118. exp patient attitude/
119. patient education/
120. exp questionnaire/
121. social psychology/
122. treatment refusal/
123. (15D\* and (HRQoL or QoL or "quality of life")).mp.
124. ((accept\* or consider\* or choice? or choos\* or chose? or decid\* or decis\* or input\* or involv\* or opinion\* or participat\* or perceiv\* or percepti\* or perspective? or prefer\* or refus\* or respons\* or valuation or value? or valuing or view\*) adj3 (citizen? or client? or consumer? or female? or male? or men or patient? or public or stake?holder\* or user? or wom#n)).tw,kw.
125. (choice? adj2 (behavio?r\* or discrete or experiment\*)).tw,kw.
126. ((choice? or choos\* or consent\* or decision\*) adj1 informed).tw,kw.
127. ((choice? or choos\* or decision\*) adj2 (made or make or makes or making or shar\* or support\*)).tw,kw.
128. (EQ 5D or EQ5D or EuroQoL 5D or EuroQoL5D).mp.
129. (focus group? or interview\* or questionnaire? or survey\*).tw,kw.
130. gambi\*.tw,kw.
131. health utilit\*.tw,kw.
132. HUI.tw,kw.
133. (multi?attribute or multi?criteria).tw,kw.
134. (preference? adj1 (elicit\* or scor\* or state\*)).tw,kw.
135. prospect theor\*.tw,kw.
136. (SF 12 or SF 36 or SF 6D or SF12 or SF36 or SF6D).mp.
137. (trade off? or tradeoff?).tw,kw.
138. (willing\* adj2 pay\*).tw,kw.
139. or/112-138 [Combined Emtree & text words for patient preferences & values]
140. and/50,139 [Combined searches for patient preferences & ASB screening]
141. and/111,139 [Combined searches for patient preferences & antibiotic treatment and pregnancy]
142. or/140-141 [Combined sets of patient preferences for ASB screening & patient preferences for antibiotic treatment in pregnancy]
143. Male/ not (Female/ and Male/)
144. 142 not 143 [Male only records excluded]
145. animals/ not (animals/ and humans/)
146. 144 not 145 [Animal only records excluded]
147. (conference\* or editorial or letter).pt.
148. 146 not 147 [Excluded publication types – RF note: will search conference proceedings separately with different strategy]

- 149. case report/ or case report\*.ti.
- 150. 148 not 149 [Case reports excluded]
- 151. limit 150 to (english or french)
- 152. remove duplicates from 151

## **KQ2: Women's Outcome Valuation**

**Database: Wiley Cochrane Library**

Date Searched: 5 July 2016

Date Updated: 5 September 2017

Records Retrieved: 45 in Cochrane Database of Systematic Reviews

Records Retrieved: 1 in Database of Abstracts of Reviews of Effects (DARE)

Records Retrieved: 321 in Cochrane Central Register of Controlled Trials (CENTRAL)

Records Retrieved: 4 in Cochrane Methodology Register

Records Retrieved: 14 in Economic Evaluations Database

- #1 [mh ^"Asymptomatic Infections"] and (bacteriuria\* or bladder\* or cystitis\* or kidney\* or pyelo-cystiti\* or pyelocystiti\* or pyelo-nephriti\* or pyelonephriti\* or urin\* or UTI\*):ti,ab,kw
- #2 [mh ^Bacteriuria]
- #3 [mh Cystitis]
- #4 [mh ^Dysuria]
- #5 [mh ^Pyelonephritis]
- #6 [mh ^"Urinary Tract Infections"]
- #7 bacilluria\*:ti,ab,kw
- #8 bacteriuria\*:ti,ab,kw
- #9 cystiti\*:ti,ab,kw
- #10 (cysto-pyeliti\* or cystopyeliti\*):ti,ab,kw
- #11 dysuria\*:ti,ab,kw
- #12 (infection\* near/2 (bladder\* or genitourin\* or kidney\* or urin\* or urogenita\*)):ti,ab,kw
- #13 (pyelo-cystiti\* or pyelocystiti\*):ti,ab,kw
- #14 (pyelo-nephriti\* or pyelonephriti\*):ti,ab,kw
- #15 (UTI or UTIs):ti,ab,kw
- #16 {or #1-#15}
- #17 [mh ^"Antibody-Coated Bacteria Test, Urinary"]
- #18 [mh ^Bacteriuria [mj]/DI,PC,MI,UR]
- #19 [mh Cystitis [mj]/DI,PC,MI,UR]
- #20 [mh ^"Mass Screening"]
- #21 [mh ^"Microbial Sensitivity Tests"]
- #22 [mh ^Microscopy]
- #23 [mh ^"Predictive Value of Tests"]
- #24 [mh ^Pyelonephritis [mj]/DI,PC,MI,UR]
- #25 [mh "Reagent Kits, Diagnostic"]
- #26 [mh "Reagent Strips"]
- #27 [mh ^"Sensitivity and Specificity"]
- #28 [mh ^Urinalysis]
- #29 [mh ^"Urinary Tract Infections" [mj]/DI,PC,MI,UR]
- #30 ((accurac\* or diagnostic) near/5 (algorithm\* or test\*)):ti,ab,kw

#31 "diagnostic accurac\*":ti,ab,kw  
#32 culture\*:ti,ab,kw  
#33 (detect\* or predict\* or screen\*):ti,ab,kw  
#34 ("dip slide\*" or dipslide\* or "dip stick\*" or dipstick\*):ti,ab,kw  
#35 (micro-scopy or microscopy):ti,ab,kw  
#36 (microb\* near/2 test\*):ti,ab,kw  
#37 ((re-agent\* or reagent) near/3 (strip\* or test\*)):ti,ab,kw  
#38 "strip\* test\*":ti,ab,kw  
#39 "urine test\*":ti,ab,kw  
#40 (urinalys\* or "urine analys\*"):ti,ab,kw  
#41 uriscreen:ti,ab,kw  
#42 {or #17-#41}  
#43 #16 and #42  
#44 [mh ^"Anti-Bacterial Agents"]  
#45 [mh ^"Antibiotic Prophylaxis"]  
#46 [mh ^"Anti-Infective Agents, Urinary"]  
#47 [mh ^"Asymptomatic Infections"/DT,TH]  
#48 [mh ^Bacteriuria [mj]/DT,TH]  
#49 [mh ^"Drug Therapy, Combination"]  
#50 [mh ^Norfloxacin]  
#51 [mh Penicillins]  
#52 [mh Sulfonamides]  
#53 [mh ^"Urinary Tract Infections" [mj]/DT,TH]  
#54 amoxicillin\*:ti,ab,kw  
#55 ampicillin\*:ti,ab,kw  
#56 ("anti-bacteria\*" or antibacteria\*):ti,ab,kw  
#57 ("anti-biotic\*" or antibiotic\*):ti,ab,kw  
#58 aztreonam\*:ti,ab,kw  
#59 cefadroxil\*:ti,ab,kw  
#60 cefepime\*:ti,ab,kw  
#61 ceftibuten\*:ti,ab,kw  
#62 ceftri?xone\*:ti,ab,kw  
#63 cefuroxime\*:ti,ab,kw  
#64 cephalixin\*:ti,ab,kw  
#65 cephalosporin\*:ti,ab,kw  
#66 cephradine\*:ti,ab,kw  
#67 clindamycin\*:ti,ab,kw  
#68 ("co-trimoxazole\*" or cotrimoxazole\*):ti,ab,kw  
#69 cycloserine\*:ti,ab,kw  
#70 fosfomycin\*:ti,ab,kw  
#71 gentam?cin\*:ti,ab,kw  
#72 "nalidixic acid\*":ti,ab,kw  
#73 nitrofurantoin\*:ti,ab,kw  
#74 penicillin\*:ti,ab,kw  
#75 piperacillin\*:ti,ab,kw  
#76 pivampicillin\*:ti,ab,kw  
#77 pivmecillinam\*:ti,ab,kw  
#78 sulfadimethoxine\*:ti,ab,kw



#79 sulfadiazine\*:ti,ab,kw  
#80 sulfamethizole\*:ti,ab,kw  
#81 sulfamethoxazole\*:ti,ab,kw  
#82 sulfamethoxy pyridazine\*:ti,ab,kw  
#83 sulfonamide\*:ti,ab,kw  
#84 sulphadimidine\*:ti,ab,kw  
#85 sulphonamide\*:ti,ab,kw  
#86 tetracycline\*:ti,ab,kw  
#87 vancomycin\*:ti,ab,kw  
#88 {or #44-#87}  
#89 [mh Pregnancy]  
#90 [mh ^"Pregnancy Complications, Infectious"]  
#91 [mh ^"Pregnant Women"]  
#92 [mh ^"Prenatal Care"]  
#93 [mh ^"Prenatal Diagnosis"]  
#94 (antenatal\* or "pre-natal\*" or prenatal\*):ti,ab,kw  
#95 (expect\* near/1 (female\* or mother\* or wom?n)):ti,ab,kw  
#96 pregnan\*:ti,ab,kw  
#97 {or #89-#96}  
#98 #88 and #97  
#99 [mh ^"Choice Behavior"]  
#100 [mh ^"Consumer Behavior" [mj]]  
#101 [mh "Consumer Participation"]  
#102 [mh ^"Cooperative Behavior"]  
#103 [mh "Decision Making"]  
#104 [mh ^"Focus Groups"]  
#105 [mh ^"Health Care Surveys"]  
#106 [mh "Informed Consent"]  
#107 [mh ^"Interviews as Topic"]  
#108 [mh ^"Patient Acceptance of Health Care"]  
#109 [mh "Patient Education as Topic"]  
#110 [mh ^"Patient Participation"]  
#111 [mh ^"Patient Preference"]  
#112 [mh ^"Social Values"]  
#113 [mh ^"Surveys and Questionnaires"]  
#114 [mh ^"Treatment Refusal"]  
#115 (15D\* and (HRQoL or QoL or "quality of life")):ti,ab,kw  
#116 ((accept\* or consider\* or choice? or choos\* or chose? or decid\* or decis\* or input\* or involv\* or opinion\* or participat\* or perceiv\* or percepti\* or perspective? or prefer\* or refus\* or respons\* or valuation or value? or valuing or view\*) near/3 (citizen? or client? or consumer? or female? or male? or men or patient? or public or stake?holder\* or user? or wom?n)):ti,ab,kw  
#117 ((analys?s or valuation? or value? or valuing) near/3 (conjoint or contingent)):ti,ab,kw  
#118 (choice? near/2 (behavio?r\* or discrete or experiment\*)):ti,ab,kw  
#119 ((choice? or choos\* or consent\* or decision\*) near/1 informed):ti,ab,kw  
#120 ((choice? or choos\* or decision\*) near/2 (made or make or makes or making or shar\* or support\*)):ti,ab,kw  
#121 ("EQ 5D" or EQ5D or "EuroQoL 5D" or EuroQoL5D):ti,ab,kw  
#122 ("focus group?" or interview\* or questionnaire? or survey\*):ti,ab,kw

#123 gambl\*:ti,ab,kw  
 #124 "health utilit\*":ti,ab,kw  
 #125 HUI:ti,ab,kw  
 #126 ("multi-attribute" or "multi-criteria" or multiattribute or multicriteria):ti,ab,kw  
 #127 (preference? near/1 (elicit\* or scor\* or state\*)):ti,ab,kw  
 #128 "prospect theor\*":ti,ab,kw  
 #129 ("SF 12" or "SF 36" or "SF 6D" or SF12 or SF36 or SF6D):ti,ab,kw  
 #130 ("trade off?" or tradeoff?):ti,ab,kw  
 #131 (willing\* near/2 pay\*):ti,ab,kw  
 #132 {or #99-#131}  
 #133 #43 and #132  
 #134 #98 and #132  
 #135 #133 or #134

## **KQ2: Women's Outcome Valuation**

**Database: Ovid PsycINFO 1806 to June Week 5 2016**

Date Searched: 5 July 2016

Date Updated: 5 September 2017

Records Retrieved: 113

1. Bacterial Disorders/ and (bladder\* or genitourin\* or kidney\* or urin\* or urogenita\*).mp.
2. Infectious Disorders/ and (bladder\* or genitourin\* or kidney\* or urin\* or urogenita\*).mp.
3. Urinary Function Disorders/ and infection\*.mp.
4. Urogenital Disorders/ and infection\*.mp.
5. bacilluria\*.mp.
6. bacteriuria\*.mp.
7. cystiti\*.mp.
8. (cysto-pyeliti\* or cystopyeliti\*).mp.
9. dysuria\*.mp.
10. (infection\* adj2 (bladder\* or genitourin\* or kidney\* or urin\* or urogenita\*)).mp.
11. (pyelo-cystiti\* or pyelocystiti\*).mp.
12. (pyelo-nephriti\* or pyelonephriti\*).mp.
13. (UTI or UTIs).mp.
14. or/1-13 [Combined subject headings & text words for bacteriuria]
15. Health Screening/
16. Screening/
17. Screening Tests/
18. Test Reliability/
19. exp Test Validity/
20. Urinalysis/
21. ((accurac\* or diagnostic) adj5 (algorithm\* or test\*)).ti,ab.
22. diagnostic accurac\*.ti,ab.
23. culture\*.ti,ab.
24. (detect\* or predict\* or screen\*).ti,ab.
25. (dip slide\* or dipslide\* or dip stick\* or dipstick\*).ti,ab.
26. (micro-scopsy or microscopy).ti,ab.
27. (microb\* adj2 test\*).ti,ab.

28. ((re-agent\* or reagent) adj3 (strip\* or test\*)).ti,ab.
29. strip\* test\*.ti,ab.
30. urine test\*.ti,ab.
31. (urinalys\* or urine analys\*).ti,ab.
32. uriscreen.ti,ab.
33. or/15-32 [Combined subject headings & text words for screening]
34. and/14,33 [Combined searches for ASB and screening]
35. antibiotics/
36. penicillins/
37. amoxicillin\*.mp.
38. ampicillin\*.mp.
39. (anti-bacteria\* or antibacteria\*).mp.
40. (anti-biotic\* or antibiotic\*).mp.
41. aztreonam\*.mp.
42. cefadroxil\*.mp.
43. cefepime\*.mp.
44. ceftibuten\*.mp.
45. ceftri?xone\*.mp.
46. cefuroxime\*.mp.
47. cephalixin\*.mp.
48. cephalosporin\*.mp.
49. cephradine\*.mp.
50. clindamycin\*.mp.
51. (co-trimoxazole\* or cotrimoxazole\*).mp.
52. cycloserine\*.mp.
53. fosfomycin\*.mp.
54. gentam#cin\*.mp.
55. nalidixic acid\*.mp.
56. nitrofurantoin\*.mp.
57. penicillin\*.mp.
58. piperacillin\*.mp.
59. pivampicillin\*.mp.
60. pivmecillinam\*.mp.
61. sulfadimethoxine\*.mp.
62. sulfadiazine\*.mp.
63. sulfamethizole\*.mp.
64. sulfamethoxazole\*.mp.
65. sulfamethoxypyridazine\*.mp.
66. sulfonamide\*.mp.
67. sulphadimidine\*.mp.
68. sulphonamide\*.mp.
69. tetracycline\*.mp.
70. vancomycin\*.mp.
71. or/35-70 [Combined subject headings & text words for antibiotic treatment]
72. adolescent pregnancy/
73. pregnancy/
74. prenatal care/
75. (antenatal\* or pre-natal\* or prenatal\*).ti,ab.

76. (expect\* adj (female? or mother? or wom#n)).ti,ab.  
77. pregnan\*.mp.  
78. or/72-77 [Combined subject headings & text words for pregnancy]  
79. and/71,78 [Combined searches for antibiotic treatment and pregnancy]  
80. Choice Behavior/  
81. Client Attitudes/  
82. Client Participation/  
83. Client Rights/  
84. Cooperation/  
85. Decision Making/  
86. \*Consumer Behavior/  
87. Informed Consent/  
88. Interviews/  
89. Preferences/  
90. Questionnaires/  
91. Social Values/  
92. Surveys/  
93. Treatment Barriers/  
94. Treatment Refusal/  
95. (15D\* and (HRQoL or QoL or "quality of life")).mp.  
96. ((accept\* or consider\* or choice? or choos\* or chose? or decid\* or decis\* or input\* or involv\* or opinion\* or participat\* or perceiv\* or percepti\* or perspective? or prefer\* or respons\* or valuation or value? or valuing or view\*) adj3 (citizen? or client? or consumer? or female? or male? or men or patient? or public or stake?holder\* or user? or wom#n)).ti,ab.  
97. ((analys#s or valuation? or value? or valuing) adj3 (conjoint or contingent)).ti,ab.  
98. (choice? adj2 (behavio?r\* or discrete or experiment\*)).mp.  
99. ((choice? or choos\* or consent\* or decision\*) adj1 informed).ti,ab.  
100. ((choice? or choos\* or decision\*) adj2 (made or make or makes or making or shar\* or support\*)).ti,ab.  
101. (EQ 5D or EQ5D or EuroQoL 5D or EuroQoL5D).mp.  
102. (focus group? or interview\* or questionnaire? or survey\*).ti,ab.  
103. gambi\*.ti,ab.  
104. health utilit\*.ti,ab.  
105. HUI.mp.  
106. (multi?attribute or multi?criteria).mp.  
107. (preference? adj1 (elicit\* or scor\* or state\*)).mp.  
108. prospect theor\*.ti,ab.  
109. (SF 12 or SF 36 or SF 6D or SF12 or SF36 or SF6D).mp.  
110. (trade off? or tradeoff?).ti,ab.  
111. (willing\* adj2 pay\*).ti,ab.  
112. or/80-111 [Combined subject & text words for patient preferences & values]  
113. and/34,112 [Combined searches for patient preferences & ASB screening]  
114. and/79,112 [Combined searches for patient preferences & antibiotic treatment and pregnancy]  
115. or/113-114 [Combined sets of patient preferences for ASB screening & patient preferences for antibiotic treatment in pregnancy]  
116. (boy\* or male\* or men).ti.  
117. 115 not 116 [Male records excluded]  
118. (case report\* or comment\* or editorial or letter).ti.

119. 117 not 118 [Opinion pieces & case reports excluded]
120. limit 119 to (english or french)
121. remove duplicates from 120

## **KQ2: Women's Outcome Valuation**

**Database: CINAHL Plus with Full Text (1937 to the present) via EBSCOhost**

Date Searched: 5 July 2016

Date Updated: 5 September 2017

Records Retrieved: 872

- S1. (MH "Bacteriuria")
- S2. (MH "Cystitis+")
- S3. (MH "Dysuria")
- S4. (MH "Pyelonephritis")
- S5. (MH "Urinary Tract Infections")
- S6. bacilluria\*
- S7. bacteriuria\*
- S8. cystiti\*
- S9. "cysto-pyeliti\*" or cystopyeliti\*
- S10. dysuria\*
- S11. (infection\* N2 (bladder\* or genitourin\* or kidney\* or urin\* or urogenita\*))
- S12. "pyelo-cystiti\*" or pyelocystiti\*
- S13. "pyelo-nephriti\*" or pyelonephriti\*
- S14. UTI or UTIs
- S15. S1 OR S2 OR S3 OR S4 OR S5 OR S6 OR S7 OR S8 OR S9 OR S10 OR S11 OR S12 OR S13 OR S14
- S16. (MM "Bacteriuria/DI/PC/MI/UR")
- S17. (MM "Cystitis+/DI/MI/PC/UR")
- S18. (MH "Fluorescent Antibody Technique")
- S19. (MH "Health Screening")
- S20. (MH "Microbial Culture and Sensitivity Tests")
- S21. (MH "Microscopy")
- S22. (MH "Predictive Value of Tests")
- S23. (MM "Pyelonephritis/DI/PC/MI/UR")
- S24. (MH "Reagent Kits, Diagnostic+")
- S25. (MH "Sensitivity and Specificity")
- S26. (MH "Urinalysis")
- S27. (MM "Urinary Tract Infections/DI/PC/MI/UR")
- S28. (accurac\* or diagnostic) N5 (algorithm\* or test\*)
- S29. "diagnostic accurac\*"
- S30. culture\*
- S31. detect\* or predict\* or screen\*
- S32. "dip slide\*" or dipslide\* or "dip stick\*" or dipstick\*
- S33. "micro-scopy" or microscopy
- S34. microb\* N2 test\*
- S35. ("re-agent\*" or reagent) N3 (strip\* or test\*)
- S36. "strip\* test\*"
- S37. "urine test\*"

S38. urinalys\* or "urine analys\*"  
S39. uriscreen  
S40. S16 OR S17 OR S18 OR S19 OR S20 OR S21 OR S22 OR S23 OR S24 OR S25 OR S26 OR S27 OR S28 OR S29 OR S30 OR S31 OR S32 OR S33 OR S34 OR S35 OR S36 OR S37 OR S38 OR S39  
S41. S15 AND S40 [Combined searches for ASB and screening]  
S42. (MH "Antibiotic Prophylaxis")  
S43. (MH "Antibiotics")  
S44. (MH "Antibiotics, Combined")  
S45. (MH "Antiinfective Agents, Urinary+")  
S46. (MM "Bacteriuria/DT/TH")  
S47. (MH "Penicillins")  
S48. (MH "Sulfonamides")  
S49. (MM "Urinary Tract Infections/DT/TH")  
S50. amoxicillin\*  
S51. ampicillin\*  
S52. ("anti-bacteria\*" or antibacteria\*)  
S53. ("anti-biotic\*" or antibiotic\*)  
S54. aztreonam\*  
S55. cefadroxil\*  
S56. cefepime\*  
S57. ceftibuten\*  
S58. ceftri?xone\*  
S59. cefuroxime\*  
S60. cephalexin\*  
S61. cephalosporin\*  
S62. cephradine\*  
S63. clindamycin\*  
S64. ("co-trimoxazole\*" or cotrimoxazole\*)  
S65. cycloserine\*  
S66. fosfomycin\*  
S67. gentam?cin\*  
S68. "nalidixic acid\*"  
S69. nitrofurantoin\*  
S70. penicillin\*  
S71. piperacillin\*  
S72. pivampicillin\*  
S73. pivmecillinam\*  
S74. sulfadimethoxine\*  
S75. sulfadiazine\*  
S76. sulfamethizole\*  
S77. sulfamethoxazole\*  
S78. sulfamethoxypridazine\*  
S79. sulfonamide\*  
S80. sulphadimidine\*  
S81. sulphonamide\*  
S82. tetracycline\*  
S83. vancomycin\*

S84. S42 OR S43 OR S44 OR S45 OR S46 OR S47 OR S48 OR S49 OR S50 OR S51 OR S52 OR S53 OR S54 OR S55 OR S56 OR S57 OR S58 OR S59 OR S60 OR S61 OR S62 OR S63 OR S64 OR S65 OR S66 OR S67 OR S68 OR S69 OR S70 OR S71 OR S72 OR S73 OR S74 OR S75 OR S76 OR S77 OR S78 OR S79 OR S80 OR S81 OR S82 OR S83

S85. (MH "Expectant Mothers")

S86. (MH "Pregnancy+")

S87. (MH "Pregnancy Complications, Infectious")

S88. (MH "Prenatal Care")

S89. (MH "Prenatal Diagnosis")

S90. antenatal\* or "pre-natal\*" or prenatal\*

S91. expect\* N1 (female? or mother? or wom?n)

S92. pregnan\*

S93. S85 OR S86 OR S87 OR S88 OR S89 OR S90 OR S91 OR S92

S94. S84 AND S93

S95. (MH "Consumer Participation")

S96. (MH "Consensus")

S97. (MH "Consent+")

S98. (MH "Cooperative Behavior")

S99. (MH "Decision Making")

S100. (MH "Decision Making, Patient")

S101. (MH "Dissent and Disputes+")

S102. (MH "Focus Groups")

S103. (MH "Interviews+")

S104. (MH "Patient Education")

S105. (MH "Quality of Health Care")

S106. (MH "Questionnaires+")

S107. (MH "Self Report")

S108. (MH "Social Values+")

S109. (MH "Surveys")

S110. (MH "Treatment Refusal")

S111. (15D\* and (HRQoL or QoL or "quality of life"))

S112. ((accept\* or consider\* or choice\* or choos\* or chose\* or decid\* or decis\* or input\* or involv\* or opinion\* or participat\* or perceiv\* or percepti\* or perspective\* or prefer\* or refus\* or respons\* or valuation or value\* or valuing or view\*) N3 (citizen\* or client\* or consumer\* or female\* or male\* or men or patient\* or public or "stake-holder\*" or stakeholder\* or user\* or wom?n))

S113. ((analys?s or valuation\* or value\* or valuing) N3 (conjoint or contingent))

S114. (choice\* N2 (behavio\* or discrete or experiment\*))

S115. ((choice\* or choos\* or consent\* or decision\*) N1 informed)

S116. ((choice\* or choos\* or decision\*) N2 (made or make or makes or making or shar\* or support\*))

S117. ("EQ 5D" or EQ5D or "EuroQoL 5D" or EuroQoL5D)

S118. ("focus group\*" or interview\* or questionnaire\* or survey\*)

S119. gamb1\*

S120. "health utilit\*"

S121. HUI

S122. ("multi-attribute" or "multi-criteria" or multiattribute or multicriteria)

S123. (preference\* N1 (elicit\* or scor\* or state\*))

S124. "prospect theor\*"

S125. ("SF 12" or "SF 36" or "SF 6D" or SF12 or SF36 or SF6D)

S126. ("trade off\*" or tradeoff\*)  
 S127. (willing\* N2 pay\*)  
 S128. S95 OR S96 OR S97 OR S98 OR S99 OR S100 OR S101 OR S102 OR S103 OR S104 OR S105 OR S106 OR S107 OR S108 OR S109 OR S110 OR S111 OR S112 OR S113 OR S114 OR S115 OR S116 OR S117 OR S118 OR S119 OR S120 OR S121 OR S122 OR S123 OR S124 OR S125 OR S126 OR S127  
 S129. S41 AND S128  
 S130. S94 AND S128  
 S131. S129 OR S130  
 S132. MH "Male" NOT ((MH "Female") AND (MH "Male"))  
 S133. S131 NOT S132  
 S134. ((MH "Vertebrates+") NOT MH Human)  
 S135. S133 NOT S134  
 S136. Limiters - Publication Type: Anecdote, Case Study, Commentary, Editorial, Letter  
 S137. S135 NOT S136  
 S138. S135 NOT S136 Narrow by Language: - english [RF: No French records in results to include]

## **KQ2: Women's Outcome Valuation**

**Database: PubMed via NCBI Entrez (1946 to Present)**

Date Searched: 5 July 2016

Records Retrieved: 65

(((((("asymptomatic infections"[mh] AND (("bacteriuria"[MeSH Terms] OR "bacteriuria"[All Fields]) OR ("bacteriuria"[MeSH Terms] OR "bacteriuria"[All Fields] OR "bacteriurias"[All Fields]) OR ("urinary bladder"[MeSH Terms] OR ("urinary"[All Fields] AND "bladder"[All Fields]) OR "urinary bladder"[All Fields] OR "bladder"[All Fields]) OR ("cystitis"[MeSH Terms] OR "cystitis"[All Fields]) OR ("kidney"[MeSH Terms] OR "kidney"[All Fields]) OR ("kidney"[MeSH Terms] OR "kidney"[All Fields] OR "kidneys"[All Fields]) OR ("pyelocystitis"[MeSH Terms] OR "pyelocystitis"[All Fields]) OR ("pyelonephritis"[MeSH Terms] OR "pyelonephritis"[All Fields]) OR ("urinary tract"[MeSH Terms] OR ("urinary"[All Fields] AND "tract"[All Fields]) OR "urinary tract"[All Fields] OR "urinary"[All Fields]) OR ("urine"[Subheading] OR "urine"[All Fields] OR "urine"[MeSH Terms]) OR UTI[all] OR ("urinary tract infections"[MeSH Terms] OR ("urinary"[All Fields] AND "tract"[All Fields] AND "infections"[All Fields]) OR "urinary tract infections"[All Fields] OR "utis"[All Fields]))) OR "bacteriuria"[MeSH Terms:noexp] OR "cystitis"[MeSH Terms] OR "dysuria"[MeSH Terms:noexp] OR "pyelonephritis"[MeSH Terms:noexp] OR "Urinary Tract Infections"[mh:noexp] OR bacilluria[tiab] OR bacteriuria[tiab] OR bacteriurias[tiab] OR "bladder infection"[tiab] OR "bladder infections"[tiab] OR cystitis[tiab] OR cystopyelitis[tiab] OR dysuria[tiab] OR "genito-urinary infection"[tiab] OR "genitourinary infection"[tiab] OR "genito-urinary infections"[tiab] OR "genitourinary infections"[tiab] OR "kidney infection"[tiab] OR "kidney infections"[tiab] OR "pyelo-nephritis"[tiab] OR pyelocystitis[tiab] OR pyelonephritis[tiab] OR "urinary infection"[tiab] OR "urinary infections"[tiab] OR "urogenital infection"[tiab] OR "urogenital infections"[tiab] OR UTI[tiab] OR UTIs[tiab]) AND ("Antibody-Coated Bacteria Test, Urinary"[mh] OR "Bacteriuria/diagnosis"[Majr] OR "Bacteriuria/prevention and control"[Majr] OR ("bacteriuria/microbiology"[Mesh Terms] AND Majr[All Fields]) OR "Bacteriuria/urine"[Majr] OR "Cystitis/diagnosis"[Majr] OR "Cystitis/prevention and control"[Majr] OR "Cystitis/microbiology"[Majr] OR "Cystitis/urine"[Majr] OR "Mass Screening"[mh:noexp] OR "Microbial Sensitivity Tests"[mh:noexp] OR "Microscopy"[mh:noexp] OR "Predictive Value of Tests"[mh:noexp] OR "Pyelonephritis/diagnosis"[Majr] OR "Pyelonephritis/prevention and control"[Majr] OR "Pyelonephritis/microbiology"[Majr] OR "Pyelonephritis/urine"[Majr] OR "Reagent



Kits, Diagnostic"[mh:noexp] OR "Reagent Strips"[mh:noexp] OR "Sensitivity and Specificity"[mh:noexp] OR "Urinalysis"[mh:noexp] OR "Urinary Tract Infections/diagnosis"[Majr] OR "Urinary Tract Infections/prevention and control"[Majr] OR "Urinary Tract Infections/microbiology"[Majr] OR "Urinary Tract Infections/urine"[Majr] OR detect[tiab] OR detected[tiab] OR detection[tiab] OR detecting[tiab] OR detects[tiab] OR "diagnostic accuracy"[tiab] OR "diagnostic algorithm"[tiab] OR "dip slide"[tiab] OR "dip slides"[tiab] OR "dip stick"[tiab] OR "dip sticks"[tiab] OR dipslide[tiab] OR dipslides[tiab] OR dipstick[tiab] OR dipsticks[tiab] OR culture[tiab] OR cultures[tiab] OR "diagnostic test"[tiab] OR "diagnostic tests"[tiab] OR "microbial test"[tiab] OR "microbial tests"[tiab] OR microscopy[tiab] OR predict[tiab] OR predicted[tiab] OR prediction[tiab] OR predicting[tiab] OR predicts[tiab] OR "reagent strip"[tiab] OR "reagent strips"[tiab] OR "reagent test"[tiab] OR "reagent testing"[tiab] OR "reagent tests"[tiab] OR screen[tiab] OR screened[tiab] OR screening[tiab] OR screens[tiab] OR "strip test"[tiab] OR "strip tests"[tiab] OR "strip testing"[tiab] OR "test accuracy"[tiab] OR urinalyses[tiab] OR urinalysis[tiab] OR "urine analyses"[tiab] OR "urine analysis"[tiab] OR "urine test"[tiab] OR "urine tested"[tiab] OR "urine testing"[tiab] OR "urine tests"[tiab] OR uriscreen[tiab])) AND ("Choice Behavior"[mh:noexp] OR "Consumer Behavior"[majr:noexp] OR "Consumer Participation"[mh] OR "Cooperative Behavior"[mh:noexp] OR "Decision Making"[mh] OR "Focus Groups"[mh:noexp] OR "Health Care Surveys"[mh:noexp] OR "Informed Consent"[mh] OR "Interviews as Topic"[mh:noexp] OR "Patient Acceptance of Health Care"[mh:noexp] OR "Patient Education as Topic"[mh] OR "Patient Participation"[mh] OR "Patient Preference"[mh:noexp] OR "Social Values"[mh:noexp] OR "Surveys and Questionnaires"[mh:noexp] OR "Treatment Refusal"[mh:noexp] OR (15D[tiab] AND (HRQoL[tiab] OR QoL[tiab] OR "quality of life"[tiab])) OR ((accept[tiab] OR accepted[tiab] OR accepting[tiab] OR accepts[tiab] OR consider[tiab] OR consideration[tiab] OR considerations[tiab] OR considered[tiab] OR considering[tiab] OR considers[tiab] OR choice[tiab] OR choices[tiab] OR choose[tiab] OR chooses[tiab] OR choosing[tiab] OR chose[tiab] OR chosen[tiab] OR decide[tiab] OR decided[tiab] OR deciding[tiab] OR decides[tiab] OR decision[tiab] OR decisionmaker[tiab] OR decisionmaking[tiab] OR decisions[tiab] OR decisive[tiab] OR input[tiab] OR involve[tiab] OR involved[tiab] OR involving[tiab] OR involvement[tiab] OR involves[tiab] OR opinion[tiab] OR opinionated[tiab] OR opinions[tiab] OR participate[tiab] OR participated[tiab] OR participating[tiab] OR participation[tiab] OR participates[tiab] OR perceive[tiab] OR perceived[tiab] OR perceiving[tiab] OR perceives[tiab] OR perception[tiab] OR perceptions[tiab] OR perceptive[tiab] OR perspective[tiab] OR perspectives[tiab] OR prefer[tiab] OR preference[tiab] OR preferences[tiab] OR preferred[tiab] OR preferring[tiab] OR refusal[tiab] OR refuse[tiab] OR refused[tiab] OR refusing[tiab] OR refuses[tiab] OR response[tiab] OR responses[tiab] OR valuation[tiab] OR value[tiab] OR valued[tiab] OR values[tiab] OR valuing[tiab] OR view[tiab] OR viewed[tiab] OR viewing[tiab] OR viewpoint[tiab] OR viewpoints[tiab] OR views[tiab]) AND (citizen[tiab] OR citizens[tiab] OR client[tiab] OR clients[tiab] OR consumer[tiab] OR consumers[tiab] OR female[tiab] OR females[tiab] OR male[tiab] OR males[tiab] OR men[tiab] OR patient[tiab] OR patients[tiab] OR public[tiab] OR "stake-holder"[tiab] OR "stake-holders"[tiab] OR stakeholder[tiab] OR stakeholders[tiab] OR user[tiab] OR users[tiab] OR woman[tiab] OR women[tiab])) OR ((analyses[tiab] OR analysis[tiab] OR valuation[tiab] OR valuations[tiab] OR value[tiab] OR values[tiab] OR valuing[tiab]) AND (conjoint[tiab] OR contingent[tiab])) OR "choice behavior"[tiab] OR "choice behaviour"[tiab] OR "choice experiment"[tiab] OR "choice experiments"[tiab] OR "discrete choice"[tiab] OR "EQ 5D"[tiab] OR EQ5D[tiab] OR "EuroQoL 5D"[tiab] OR EuroQoL5D[tiab] OR "focus group"[tiab] OR "focus groups"[tiab] OR gamble[tiab] OR gambled[tiab] OR gambling[tiab] OR gambles[tiab] OR "health utilities"[tiab] OR "health utility"[tiab] OR HUI[tiab] OR "informed choice"[tiab] OR "informed choices"[tiab] OR "informed consent"[tiab] OR "informed decision"[tiab] OR interview[tiab] OR interviewed[tiab] OR interviewing[tiab] OR interviews[tiab] OR "multi-attribute"[tiab] OR "multi-criteria"[tiab] OR multiattribute[tiab] OR

multicriteria[tiab] OR "preference score"[tiab] OR "preference scores"[tiab] OR "preference scoring"[tiab] OR "prospect theory"[tiab] OR questionnaire[tiab] OR questionnaires[tiab] OR "SF 12"[tiab] OR "SF 36"[tiab] OR "SF 6D"[tiab] OR SF12[tiab] OR SF36[tiab] OR SF6D[tiab] OR "stated preference"[tiab] OR survey[tiab] OR surveyed[tiab] OR surveys[tiab] OR "trade off"[tiab] OR "trade offs"[tiab] OR tradeoff[tiab] OR tradeoffs[tiab] OR "willing to pay"[tiab] OR "willingness to pay"[tiab])) OR (((("Anti-Bacterial Agents"[mh:noexp] OR "Antibiotic Prophylaxis"[mh:noexp] OR "Anti-Infective Agents, Urinary"[mh] OR "Asymptomatic Infections/therapy"[mh] OR "Bacteriuria/drug therapy"[Majr] OR "Bacteriuria/therapy"[Majr] OR "Drug Therapy, Combination"[mh:noexp] OR "Norfloxacin"[mh:noexp] OR "Penicillins"[mh] OR "Sulfonamides"[mh] OR "Urinary Tract Infections/drug therapy"[Majr] OR "Urinary Tract Infections/therapy"[Majr] OR amoxicillin[tiab] OR amoxicillins[tiab] OR ampicillin[tiab] OR ampicillins[tiab] OR "anti-bacteria"[tiab] OR "anti-bacterial"[tiab] OR "anti-bacterials"[tiab] AND "anti-biotic"[tiab] OR "anti-biotics"[tiab] OR antibacteria[tiab] OR antibacterial[tiab] OR antibacterials[tiab] OR antibiotic[tiab] OR antibiotics[tiab] OR aztreonam[tiab] OR cefadroxil[tiab] OR cefepime[tiab] OR ceftibuten[tiab] OR ceftriaxone[tiab] OR cefuroxime[tiab] OR cephalixin[tiab] OR cephalosporin[tiab] OR cephalosporins[tiab] OR cephadrine[tiab] OR clindamycin[tiab] OR "co-trimoxazole"[tiab] OR cotrimoxazole[tiab] OR cycloserine[tiab] OR cycloserines[tiab] OR fosfomycin[tiab] OR gentamicin[tiab] OR gentamycin[tiab] OR "nalidixic acid"[tiab] OR nitrofurantoin[tiab] OR penicillin[tiab] OR penicillins[tiab] OR piperacillin[tiab] OR pivampicillin[tiab] OR pivmecillinam[tiab] OR sulfadimethoxine[tiab] OR sulfadiazine[tiab] OR sulfamethizole[tiab] OR sulfamethoxazole[tiab] OR sulfamethoxypyridazine[tiab] OR sulfonamide[tiab] OR sulfonamides[tiab] OR sulphadimidine[tiab] OR sulphonamide[tiab] OR tetracycline[tiab] OR tetracyclines[tiab] OR vancomycin[tiab])) AND ("Pregnancy"[mh] OR "Pregnancy Complications, Infectious"[mh:noexp] OR "Pregnant Women"[mh:noexp] OR "Prenatal Care"[mh:noexp] OR "Prenatal Diagnosis"[mh:noexp] OR antenatal[tiab] OR "pre-natal"[tiab] OR prenatal[tiab] OR "expectant mother"[tiab] OR "expectant mothers"[tiab] OR "expecting mothers"[tiab] OR "expecting mothers"[tiab] OR "expectant woman"[tiab] OR "expectant women"[tiab] OR "expecting women"[tiab] OR pregnancies[tiab] OR pregnancy[tiab] OR pregnant[tiab])) AND ("Choice Behavior"[mh:noexp] OR "Consumer Behavior"[majr:noexp] OR "Consumer Participation"[mh] OR "Cooperative Behavior"[mh:noexp] OR "Decision Making"[mh] OR "Focus Groups"[mh:noexp] OR "Health Care Surveys"[mh:noexp] OR "Informed Consent"[mh] OR "Interviews as Topic"[mh:noexp] OR "Patient Acceptance of Health Care"[mh:noexp] OR "Patient Education as Topic"[mh] OR "Patient Participation"[mh] OR "Patient Preference"[mh:noexp] OR "Social Values"[mh:noexp] OR "Surveys and Questionnaires"[mh:noexp] OR "Treatment Refusal"[mh:noexp] OR (15D[tiab] AND (HRQoL[tiab] OR QoL[tiab] OR "quality of life"[tiab])) OR ((accept[tiab] OR accepted[tiab] OR accepting[tiab] OR accepts[tiab] OR consider[tiab] OR consideration[tiab] OR considerations[tiab] OR considered[tiab] OR considering[tiab] OR considers[tiab] OR choice[tiab] OR choices[tiab] OR choose[tiab] OR chooses[tiab] OR choosing[tiab] OR chose[tiab] OR chosen[tiab] OR decide[tiab] OR decided[tiab] OR deciding[tiab] OR decides[tiab] OR decision[tiab] OR decisionmaker[tiab] OR decisionmaking[tiab] OR decisions[tiab] OR decisive[tiab] OR input[tiab] OR involve[tiab] OR involved[tiab] OR involving[tiab] OR involvement[tiab] OR involves[tiab] OR opinion[tiab] OR opinionated[tiab] OR opinions[tiab] OR participate[tiab] OR participated[tiab] OR participating[tiab] OR participation[tiab] OR participates[tiab] OR perceive[tiab] OR perceived[tiab] OR perceiving[tiab] OR perceives[tiab] OR perception[tiab] OR perceptions[tiab] OR perceptive[tiab] OR perspective[tiab] OR perspectives[tiab] OR prefer[tiab] OR preference[tiab] OR preferences[tiab] OR preferred[tiab] OR preferring[tiab] OR refusal[tiab] OR refuse[tiab] OR refused[tiab] OR refusing[tiab] OR refuses[tiab] OR response[tiab] OR responses[tiab] OR valuation[tiab] OR value[tiab] OR valued[tiab] OR values[tiab] OR valuing[tiab] OR view[tiab] OR viewed[tiab] OR viewing[tiab] OR viewpoint[tiab] OR viewpoints[tiab] OR views[tiab]))

AND (citizen[tiab] OR citizens[tiab] OR client[tiab] OR clients[tiab] OR consumer[tiab] OR consumers[tiab] OR female[tiab] OR females[tiab] OR male[tiab] OR males[tiab] OR men[tiab] OR patient[tiab] OR patients[tiab] OR public[tiab] OR "stake-holder"[tiab] OR "stake-holders"[tiab] OR stakeholder[tiab] OR stakeholders[tiab] OR user[tiab] OR users[tiab] OR woman[tiab] OR women[tiab])) OR ((analyses[tiab] OR analysis[tiab] OR valuation[tiab] OR valuations[tiab] OR value[tiab] OR values[tiab] OR valuing[tiab]) AND (conjoint[tiab] OR contingent[tiab])) OR "choice behavior"[tiab] OR "choice behaviour"[tiab] OR "choice experiment"[tiab] OR "choice experiments"[tiab] OR "discrete choice"[tiab] OR "EQ 5D"[tiab] OR EQ5D[tiab] OR "EuroQoL 5D"[tiab] OR EuroQoL5D[tiab] OR "focus group"[tiab] OR "focus groups"[tiab] OR gamble[tiab] OR gambled[tiab] OR gambling[tiab] OR gambles[tiab] OR "health utilities"[tiab] OR "health utility"[tiab] OR HUI[tiab] OR "informed choice"[tiab] OR "informed choices"[tiab] OR "informed consent"[tiab] OR "informed decision"[tiab] OR interview[tiab] OR interviewed[tiab] OR interviewing[tiab] OR interviews[tiab] OR "multi-attribute"[tiab] OR "multi-criteria"[tiab] OR multiattribute[tiab] OR multicriteria[tiab] OR "preference score"[tiab] OR "preference scores"[tiab] OR "preference scoring"[tiab] OR "prospect theory"[tiab] OR questionnaire[tiab] OR questionnaires[tiab] OR "SF 12"[tiab] OR "SF 36"[tiab] OR "SF 6D"[tiab] OR SF12[tiab] OR SF36[tiab] OR SF6D[tiab] OR "stated preference"[tiab] OR survey[tiab] OR surveyed[tiab] OR surveys[tiab] OR "trade off"[tiab] OR "trade offs"[tiab] OR tradeoff[tiab] OR tradeoffs[tiab] OR "willing to pay"[tiab] OR "willingness to pay"[tiab])) NOT ("Male"[mh] NOT ("Female"[mh] AND "Male"[mh])) NOT (((Animals[MESH] OR Animal Experimentation[MESH] OR "Models, Animal"[MESH] OR Vertebrates[MESH]) NOT (Humans[MESH] OR Human experimentation[MESH])) OR (((animals[tiab] OR animal model[tiab] OR rat[tiab] OR rats[tiab] OR mouse[tiab] OR mice[tiab] OR rabbit[tiab] OR rabbits[tiab] OR pig[tiab] OR pigs[tiab] OR porcine[tiab] OR swine[tiab] OR dog[tiab] OR dogs[tiab] OR hamster[tiab] OR hamsters[tiab] OR chicken[tiab] OR chickens[tiab] OR sheep[tiab]) AND (publisher[sb] OR inprocess[sb] OR pubmednotmedline[sb])) NOT (human[ti] OR humans[ti] OR people[ti] OR children[ti] OR adults[ti] OR seniors[ti] OR patient[ti] OR patients[ti])))) NOT (case reports[pt] OR comment[pt] OR editorial[pt] OR letter[pt] OR newspaper article[pt])) AND ((publisher[sb] NOT pubstatusnihms NOT pubstatuspmcsd NOT pmcbook) OR (pubstatusaheadofprint))  
 > limit to English or French

#### **KQs4,5: Systematic Review & HTA Search**

**Database: PubMed via NCBI Entrez (1946 to Present)**

Date Searched: 14 October 2016

Records Retrieved: 104

(((((("asymptomatic infections"[mh] AND (("bacteriuria"[MeSH Terms] OR "bacteriuria"[All Fields]) OR ("bacteriuria"[MeSH Terms] OR "bacteriuria"[All Fields] OR "bacteriurias"[All Fields]) OR ("urinary bladder"[MeSH Terms] OR ("urinary"[All Fields] AND "bladder"[All Fields]) OR "urinary bladder"[All Fields] OR "bladder"[All Fields]) OR ("cystitis"[MeSH Terms] OR "cystitis"[All Fields]) OR ("kidney"[MeSH Terms] OR "kidney"[All Fields]) OR ("kidney"[MeSH Terms] OR "kidney"[All Fields] OR "kidneys"[All Fields]) OR ("pyelocystitis"[MeSH Terms] OR "pyelocystitis"[All Fields]) OR ("pyelonephritis"[MeSH Terms] OR "pyelonephritis"[All Fields]) OR ("urinary tract"[MeSH Terms] OR ("urinary"[All Fields] AND "tract"[All Fields]) OR "urinary tract"[All Fields] OR "urinary"[All Fields]) OR ("urine"[Subheading] OR "urine"[All Fields] OR "urine"[MeSH Terms]) OR UTI[all] OR ("urinary tract infections"[MeSH Terms] OR ("urinary"[All Fields] AND "tract"[All Fields] AND "infections"[All Fields]) OR "urinary tract infections"[All Fields] OR "utis"[All Fields]))) OR "bacteriuria"[MeSH Terms:noexp] OR "cystitis"[MeSH Terms] OR "dysuria"[MeSH Terms:noexp] OR "pyelonephritis"[MeSH

Terms:noexp] OR "Urinary Tract Infections"[mh:noexp] OR bacilluria[tiab] OR bacteriuria[tiab] OR bacteriurias[tiab] OR "bladder infection"[tiab] OR "bladder infections"[tiab] OR cystitis[tiab] OR cystopyelitis[tiab] OR dysuria[tiab] OR "genito-urinary infection"[tiab] OR "genitourinary infection"[tiab] OR "genito-urinary infections"[tiab] OR "genitourinary infections"[tiab] OR "kidney infection"[tiab] OR "kidney infections"[tiab] OR "pyelo-nephritis"[tiab] OR pyelocystitis[tiab] OR pyelonephritis[tiab] OR "urinary infection"[tiab] OR "urinary infections"[tiab] OR "urogenital infection"[tiab] OR "urogenital infections"[tiab] OR UTI[tiab] OR UTIs[tiab]) AND (("Antibody-Coated Bacteria Test, Urinary"[mh] OR "Bacteriuria/diagnosis"[Majr] OR "Bacteriuria/prevention and control"[Majr] OR ("bacteriuria/microbiology"[Mesh Terms] AND Majr[All Fields]) OR "Bacteriuria/urine"[Majr] OR "Cystitis/diagnosis"[Majr] OR "Cystitis/prevention and control"[Majr] OR "Cystitis/microbiology"[Majr] OR "Cystitis/urine"[Majr] OR "Mass Screening"[mh:noexp] OR "Microbial Sensitivity Tests"[mh:noexp] OR "Microscopy"[mh:noexp] OR "Predictive Value of Tests"[mh:noexp] OR "Pyelonephritis/diagnosis"[Majr] OR "Pyelonephritis/prevention and control"[Majr] OR "Pyelonephritis/microbiology"[Majr] OR "Pyelonephritis/urine"[Majr] OR "Reagent Kits, Diagnostic"[mh:noexp] OR "Reagent Strips"[mh:noexp] OR "Sensitivity and Specificity"[mh:noexp] OR "Urinalysis"[mh:noexp] OR "Urinary Tract Infections/diagnosis"[Majr] OR "Urinary Tract Infections/prevention and control"[Majr] OR "Urinary Tract Infections/microbiology"[Majr] OR "Urinary Tract Infections/urine"[Majr] OR detect[tiab] OR detected[tiab] OR detection[tiab] OR detecting[tiab] OR detects[tiab] OR "diagnostic accuracy"[tiab] OR "diagnostic algorithm"[tiab] OR "dip slide"[tiab] OR "dip slides"[tiab] OR "dip stick"[tiab] OR "dip sticks"[tiab] OR dipslide[tiab] OR dipslides[tiab] OR dipstick[tiab] OR dipsticks[tiab] OR culture[tiab] OR cultures[tiab] OR "diagnostic test"[tiab] OR "diagnostic tests"[tiab] OR "microbial test"[tiab] OR "microbial tests"[tiab] OR microscopy[tiab] OR predict[tiab] OR predicted[tiab] OR prediction[tiab] OR predicting[tiab] OR predicts[tiab] OR "reagent strip"[tiab] OR "reagent strips"[tiab] OR "reagent test"[tiab] OR "reagent testing"[tiab] OR "reagent tests"[tiab] OR screen[tiab] OR screened[tiab] OR screening[tiab] OR screens[tiab] OR "strip test"[tiab] OR "strip tests"[tiab] OR "strip testing"[tiab] OR "test accuracy"[tiab] OR urinalyses[tiab] OR urinalysis[tiab] OR "urine analyses"[tiab] OR "urine analysis"[tiab] OR "urine test"[tiab] OR "urine tested"[tiab] OR "urine testing"[tiab] OR "urine tests"[tiab] OR uriscreen[tiab]) OR ("Anti-Bacterial Agents"[mh:noexp] OR "Antibiotic Prophylaxis"[mh:noexp] OR "Anti-Infective Agents, Urinary"[mh] OR "Asymptomatic Infections/therapy"[mh] OR "Bacteriuria/drug therapy"[Majr] OR "Bacteriuria/therapy"[Majr] OR "Drug Therapy, Combination"[mh:noexp] OR "Norfloxacin"[mh:noexp] OR "Penicillins"[mh] OR "Sulfonamides"[mh] OR "Urinary Tract Infections/drug therapy"[Majr] OR "Urinary Tract Infections/therapy"[Majr] OR amoxicillin[tiab] OR amoxicillins[tiab] OR ampicillin[tiab] OR ampicillins[tiab] OR "anti-bacteria"[tiab] OR "anti-bacterial"[tiab] OR "anti-bacterials"[tiab] AND "antibiotic"[tiab] OR "anti-biotics"[tiab] OR antibacteria[tiab] OR antibacterial[tiab] OR antibacterials[tiab] OR antibiotic[tiab] OR antibiotics[tiab] OR aztreonam[tiab] OR cefadroxil[tiab] OR cefepime[tiab] OR ceftibuten[tiab] OR ceftriaxone[tiab] OR cefuroxime[tiab] OR cephalixin[tiab] OR cephalosporin[tiab] OR cephalosporins[tiab] OR cephradine[tiab] OR clindamycin[tiab] OR "co-trimoxazole"[tiab] OR cotrimoxazole[tiab] OR cycloserine[tiab] OR cycloserines[tiab] OR fosfomycin[tiab] OR gentamicin[tiab] OR gentamycin[tiab] OR "nalidixic acid"[tiab] OR nitrofurantoin[tiab] OR penicillin[tiab] OR penicillins[tiab] OR piperacillin[tiab] OR pivampicillin[tiab] OR pivmecillinam[tiab] OR sulfadimethoxine[tiab] OR sulfadiazine[tiab] OR sulfamethizole[tiab] OR sulfamethoxazole[tiab] OR sulfamethoxypyridazine[tiab] OR sulfonamide[tiab] OR sulfonamides[tiab] OR sulphadimidine[tiab] OR sulphonamide[tiab] OR tetracycline[tiab] OR tetracyclines[tiab] OR vancomycin[tiab])) AND ("Pregnancy"[mh] OR "Pregnancy Complications, Infectious"[mh:noexp] OR "Pregnant Women"[mh:noexp] OR "Prenatal Care"[mh:noexp] OR "Prenatal Diagnosis"[mh:noexp] OR antenatal[tiab] OR "pre-natal"[tiab] OR prenatal[tiab] OR "expectant mother"[tiab] OR "expectant

mothers"[tiab] OR "expecting mothers"[tiab] OR "expecting mothers"[tiab] OR "expectant woman"[tiab] OR "expectant women"[tiab] OR "expecting women"[tiab] OR pregnancies[tiab] OR pregnancy[tiab] OR pregnant[tiab])) AND (systematic[sb] OR meta-analysis[pt] OR meta-analysis as topic[mh] OR meta-analysis[mh] OR meta analy\*[tw] OR metanaly\*[tw] OR metaanaly\*[tw] OR met analy\*[tw] OR integrative research[tiab] OR integrative review\*[tiab] OR integrative overview\*[tiab] OR research integration\*[tiab] OR research overview\*[tiab] OR collaborative review\*[tiab] OR collaborative overview\*[tiab] OR systematic review\*[tiab] OR technology assessment\*[tiab] OR technology overview\*[tiab] OR "Technology Assessment, Biomedical"[mh] OR HTA[tiab] OR HTAs[tiab] OR comparative efficacy[tiab] OR comparative effectiveness[tiab] OR outcomes research[tiab] OR indirect comparison\*[tiab] OR ((indirect treatment[tiab] OR mixed-treatment[tiab]) AND comparison\*[tiab]) OR Embase\*[tiab] OR Cinahl\*[tiab] OR systematic overview\*[tiab] OR methodological overview\*[tiab] OR methodologic overview\*[tiab] OR methodological review\*[tiab] OR methodologic review\*[tiab] OR quantitative review\*[tiab] OR quantitative overview\*[tiab] OR quantitative syntheses\*[tiab] OR pooled analy\*[tiab] OR Cochrane[tiab] OR Medline[tiab] OR Pubmed[tiab] OR Medlars[tiab] OR handsearch\*[tiab] OR hand search\*[tiab] OR meta-regression\*[tiab] OR metaregression\*[tiab] OR data syntheses\*[tiab] OR data extraction[tiab] OR data abstraction\*[tiab] OR mantel haenszel[tiab] OR peto[tiab] OR der-simonian[tiab] OR dersimonian[tiab] OR fixed effect\*[tiab] OR "Cochrane Database Syst Rev"[Journal] OR "health technology assessment winchester, england"[Journal] OR "Evid Rep Technol Assess (Full Rep)"[Journal] OR "Evid Rep Technol Assess (Summ)"[Journal] OR "Int J Technol Assess Health Care"[Journal] OR "GMS Health Technol Assess"[Journal] OR "Health Technol Assess (Rockv)"[Journal] OR "Health Technol Assess Rep"[Journal])) NOT ("Male"[mh] NOT ("Female"[mh] AND "Male"[mh])) NOT (((Animals[MESH] OR Animal Experimentation[MESH] OR "Models, Animal"[MESH] OR Vertebrates[MESH]) NOT (Humans[MESH] OR Human experimentation[MESH])) OR (((animals[tiab] OR animal model[tiab] OR rat[tiab] OR rats[tiab] OR mouse[tiab] OR mice[tiab] OR rabbit[tiab] OR rabbits[tiab] OR pig[tiab] OR pigs[tiab] OR porcine[tiab] OR swine[tiab] OR dog[tiab] OR dogs[tiab] OR hamster[tiab] OR hamsters[tiab] OR chicken[tiab] OR chickens[tiab] OR sheep[tiab]) AND (publisher[sb] OR inprocess[sb] OR pubmednotmedline[sb])) NOT (human[ti] OR humans[ti] OR people[ti] OR children[ti] OR adults[ti] OR seniors[ti] OR patient[ti] OR patients[ti]))) NOT (case reports[pt] OR comment[pt] OR editorial[pt] OR letter[pt] OR newspaper article[pt])

#### **KQs4,5: Systematic Review & HTA Search**

**Database: Wiley Cochrane Library**

Date Searched: 14 October 2016

Records Retrieved: 19 in Cochrane Database of Systematic Reviews

Records Retrieved: 4 in Database of Abstracts of Reviews of Effects (DARE)

Records Retrieved: 1 in Health Technology Assessment Database

Records Retrieved: 3 in Economic Evaluations Database

#1 [mh ^"Asymptomatic Infections"] and (bacteriuria\* or bladder\* or cystitis\* or kidney\* or pyelo-cystiti\* or pyelocystiti\* or pyelo-nephriti\* or pyelonephriti\* or urin\* or UTI\*):ti,ab,kw

#2 [mh ^Bacteriuria]

#3 [mh Cystitis]

#4 [mh ^Dysuria]

#5 [mh ^Pyelonephritis]

#6 [mh ^"Urinary Tract Infections"]

#7 bacilluria\*:ti,ab,kw  
#8 bacteriuria\*:ti,ab,kw  
#9 cystiti\*:ti,ab,kw  
#10 (cysto-pyeliti\* or cystopyeliti\*):ti,ab,kw  
#11 dysuria\*:ti,ab,kw  
#12 (infection\* near/2 (bladder\* or genitourin\* or kidney\* or urin\* or urogenita\*)):ti,ab,kw  
#13 (pyelo-cystiti\* or pyelocystiti\*):ti,ab,kw  
#14 (pyelo-nephriti\* or pyelonephriti\*):ti,ab,kw  
#15 (UTI or UTIs):ti,ab,kw  
#16 {or #1-#15}  
#17 [mh ^"Antibody-Coated Bacteria Test, Urinary"]  
#18 [mh ^Bacteriuria [mj]/DI,PC,MI,UR]  
#19 [mh Cystitis [mj]/DI,PC,MI,UR]  
#20 [mh ^"Mass Screening"]  
#21 [mh ^"Microbial Sensitivity Tests"]  
#22 [mh ^Microscopy]  
#23 [mh ^"Predictive Value of Tests"]  
#24 [mh ^Pyelonephritis [mj]/DI,PC,MI,UR]  
#25 [mh "Reagent Kits, Diagnostic"]  
#26 [mh "Reagent Strips"]  
#27 [mh ^"Sensitivity and Specificity"]  
#28 [mh ^Urinalysis]  
#29 [mh ^"Urinary Tract Infections" [mj]/DI,PC,MI,UR]  
#30 ((accurac\* or diagnostic) near/5 (algorithm\* or test\*)):ti,ab,kw  
#31 "diagnostic accurac\*":ti,ab,kw  
#32 culture\*:ti,ab,kw  
#33 (detect\* or predict\* or screen\*):ti,ab,kw  
#34 ("dip slide\*" or dipslide\* or "dip stick\*" or dipstick\*):ti,ab,kw  
#35 (micro-scopy or microscopy):ti,ab,kw  
#36 (microb\* near/2 test\*):ti,ab,kw  
#37 ((re-agent\* or reagent) near/3 (strip\* or test\*)):ti,ab,kw  
#38 "strip\* test\*":ti,ab,kw  
#39 "urine test\*":ti,ab,kw  
#40 (urinalys\* or "urine analys\*"):ti,ab,kw  
#41 uriscreen:ti,ab,kw  
#42 {or #17-#41}  
#43 [mh ^"Anti-Bacterial Agents"]  
#44 [mh ^"Antibiotic Prophylaxis"]  
#45 [mh ^"Anti-Infective Agents, Urinary"]  
#46 [mh ^"Asymptomatic Infections"/DT,TH]  
#47 [mh ^Bacteriuria [mj]/DT,TH]  
#48 [mh ^"Drug Therapy, Combination"]  
#49 [mh ^Norfloxacin]  
#50 [mh Penicillins]  
#51 [mh Sulfonamides]  
#52 [mh ^"Urinary Tract Infections" [mj]/DT,TH]  
#53 amoxicillin\*:ti,ab,kw  
#54 ampicillin\*:ti,ab,kw

#55 ("anti-bacteria\*" or antibacteria\*):ti,ab,kw  
#56 ("anti-biotic\*" or antibiotic\*):ti,ab,kw  
#57 aztreonam\*:ti,ab,kw  
#58 cefadroxil\*:ti,ab,kw  
#59 cefepime\*:ti,ab,kw  
#60 ceftibuten\*:ti,ab,kw  
#61 ceftri?xone\*:ti,ab,kw  
#62 cefuroxime\*:ti,ab,kw  
#63 cephalixin\*:ti,ab,kw  
#64 cephalosporin\*:ti,ab,kw  
#65 cephradine\*:ti,ab,kw  
#66 clindamycin\*:ti,ab,kw  
#67 ("co-trimoxazole\*" or cotrimoxazole\*):ti,ab,kw  
#68 cycloserine\*:ti,ab,kw  
#69 fosfomycin\*:ti,ab,kw  
#70 gentam?cin\*:ti,ab,kw  
#71 "nalidixic acid\*":ti,ab,kw  
#72 nitrofurantoin\*:ti,ab,kw  
#73 penicillin\*:ti,ab,kw  
#74 piperacillin\*:ti,ab,kw  
#75 pivampicillin\*:ti,ab,kw  
#76 pivmecillinam\*:ti,ab,kw  
#77 sulfadimethoxine\*:ti,ab,kw  
#78 sulfadiazine\*:ti,ab,kw  
#79 sulfamethizole\*:ti,ab,kw  
#80 sulfamethoxazole\*:ti,ab,kw  
#81 sulfamethoxypyridazine\*:ti,ab,kw  
#82 sulfonamide\*:ti,ab,kw  
#83 sulphadimidine\*:ti,ab,kw  
#84 sulphonamide\*:ti,ab,kw  
#85 tetracycline\*:ti,ab,kw  
#86 vancomycin\*:ti,ab,kw  
#87 {or #43-#86}  
#88 #16 and (#42 or #87)  
#89 [mh Pregnancy]  
#90 [mh ^"Pregnancy Complications, Infectious"]  
#91 [mh ^"Pregnant Women"]  
#92 [mh ^"Prenatal Care"]  
#93 [mh ^"Prenatal Diagnosis"]  
#94 (antenatal\* or "pre-natal\*" or prenatal\*):ti,ab,kw  
#95 (expect\* near/1 (female\* or mother\* or wom?n)):ti,ab,kw  
#96 pregnan\*:ti,ab,kw  
#97 {or #89-#96}  
#98 #88 and #97

### **Additional Search Sources**

**Database: ProQuest Dissertations & Theses Global (1861 to current)**

Date Searched: 10 August 2016

Records Retrieved: 135

((((TI,AB(bacilluria\* OR bacteriuria\* OR cystiti\* OR cystopyeliti\* OR dysuria\* OR (infection\* NEAR/2 (bladder\* OR genitourin\* OR kidney\* OR urin\* OR urogenita\*)) OR pyelocystiti\* OR pyelonephriti\* OR UTI OR UTIs) AND (su.Exact("prenatal care" OR "pregnancy") OR TI,AB(prenatal\* OR (expect\* NEAR/1 (female\* OR mother\* OR wom?n)) OR pregnan\*)) AND ((su.Exact("urinalysis" OR "medical screening" OR "sensitivity analysis" OR "microscopy") OR TI,AB(((accurac\* OR diagnostic) NEAR/5 (algorithm\* OR test\*)) OR "diagnostic accurac\*" OR culture\* OR detect\* OR "dip slide\*" OR dipslide\* OR "dip stick\*" OR dipstick\* OR microscopy OR (microb\* NEAR/2 test\*) OR predict\* OR ((re-agent\* OR reagent\*) NEAR/3 (strip\* OR test\*)) OR screen\* OR "strip\* test\*" OR "urine test\*" OR urinalys\* OR "urine analys\*" OR uriscreen)) OR (su.Exact("antibiotics") OR TI,AB(amoxicillin\* OR ampicillin\* OR anti-bacteria\* OR antibacteria\* OR anti-biotic\* OR antibiotic\* OR aztreonam\* OR cefadroxil\* OR cefepime\* OR ceftibuten\* OR ceftri\*xone\* OR cefuroxime\* OR cephalixin\* OR cephalosporin\* OR cephradine\* OR clindamycin\* OR co-trimoxazole\* OR cotrimoxazole\* OR cycloserine\* OR fosfomycin\* OR gentam?cin\* OR "nalidixic acid\*" OR nitrofurantoin\* OR penicillin\* OR piperacillin\* OR pivampicillin\* OR pivmecillinam\* OR sulfadimethoxine\* OR sulfadiazine\* OR sulfamethizole\* OR sulfamethoxazole\* OR sulfamethoxypridazine\* OR sulfonamide\* sulphadimidine\* OR sulphonamide\* OR tetracycline\* OR vancomycin\*)))) OR ((su.Exact("prenatal care" OR "pregnancy") OR TI,AB(prenatal\* OR (expect\* NEAR/1 (female\* OR mother\* OR wom?n)) OR pregnan\*)) AND (su.Exact("antibiotics") OR TI,AB(amoxicillin\* OR ampicillin\* OR anti-bacteria\* OR antibacteria\* OR anti-biotic\* OR antibiotic\* OR aztreonam\* OR cefadroxil\* OR cefepime\* OR ceftibuten\* OR ceftri\*xone\* OR cefuroxime\* OR cephalixin\* OR cephalosporin\* OR cephradine\* OR clindamycin\* OR co-trimoxazole\* OR cotrimoxazole\* OR cycloserine\* OR fosfomycin\* OR gentam?cin\* OR "nalidixic acid\*" OR nitrofurantoin\* OR penicillin\* OR piperacillin\* OR pivampicillin\* OR pivmecillinam\* OR sulfadimethoxine\* OR sulfadiazine\* OR sulfamethizole\* OR sulfamethoxazole\* OR sulfamethoxypridazine\* OR sulfonamide\* sulphadimidine\* OR sulphonamide\* OR tetracycline\* OR vancomycin\*)))) NOT (su.Exact("laboratory animals") OR TI(animal OR animal-model\* OR animals OR canine\* OR cat OR cats OR dog OR dogs OR feline OR felines OR hamster OR hamsters OR mice OR monkey OR monkeys OR mouse OR pig OR piglet OR piglets OR pigs OR porcine OR primate\* OR rabbit OR rabbits OR rat OR rats OR rodent OR rodents OR sheep OR swine OR swines))) AND la("ENG" OR "FRE")

### **Additional Search Sources**

**Registry: ClinicalTrials.gov**

URL: <https://clinicaltrials.gov/>

Date Searched: 10 August 2016

Records Retrieved: 48

S1. Advanced search:

Search Terms: pregnancy OR pregnant OR prenatal

AND

Conditions: "Bacteriuria" OR "Cystitis" OR "Dysuria" OR "Urinary Tract Infections"

Limit to studies with female participants

Retrieved: 15



S2. Advanced search:

Search Terms: pregnancy OR pregnant OR prenatal

AND

Interventions: amoxicillin OR ampicillin OR antibiotic OR antibiotics OR "antibacterial agent" OR "antibacterial agents" OR antibacterials OR cephalosporin OR clindamycin OR cotrimoxazole OR fosfomycin OR nitrofurantoin OR penicillin OR sulphonamide OR tetracycline OR vancomycin

Retrieved: 162

S3. Advanced search:

Search Terms: pregnancy OR pregnant OR prenatal

AND

Condition: "Infections"

Interventions: "urine culture" OR "urine test" OR "urine tests" OR "urinary screening" OR urinalysis

Limit to studies with female participants

Retrieved: 4 [RF Note: Removed 4 duplicates in EndNote, and 133 pre-2014 records]

### **Additional Search Sources**

**Registry: World Health Organization's International Clinical Trial Registry Platform (ICTRP)**

URL: <http://apps.who.int/trialsearch/>

Records Retrieved: 11

S1. Advanced search:

Title Search Terms: antenatal OR pregnancy OR pregnant OR prenatal

AND

Conditions: bacteriuria OR cystitis OR dysuria OR urinary tract infection OR urinary tract infections OR UTI OR UTIs

Recruitment status is: All

Date of registration is between: 01/01/2014 and 10/08/2016

Retrieved: 5

S2. Advanced search:

Title Search Terms: antenatal OR pregnancy OR pregnant OR prenatal

AND

Interventions: antibiotic OR antibiotics OR antibacterial agent OR antibacterial agents

Recruitment status is: All

Date of registration is between: 01/01/2014 and 10/08/2016

Retrieved: 6

S3. Advanced search:

Title Search Terms: antenatal OR pregnancy OR pregnant OR prenatal

AND

Interventions: urine culture OR urine test OR urine tests OR urine screening OR urinary screening OR urinalysis

Recruitment status is: All

Date of registration is between: 01/01/2014 and 10/08/2016

Retrieved: 0

### **Additional Search Sources**

**Database: University of York, Centre for Reviews and Dissemination – Health Technology Assessment (HTA) Database**

Date Searched: 10 August 2016

Records Retrieved: 1

#### S1. Search HTA Database

Any field: bacteriuria

AND

Any field: antenatal OR pregnan\* OR prenatal

Retrieved: 1

#### S2. Search HTA Database

Any field: urin\*

AND

Any field: antenatal OR pregnan\* OR prenatal

Retrieved: 14 (retained 0 ; 1 duplicate)

#### S3. Search HTA Database

Any field: antibiotic\* OR antibacterial

AND

Any field: antenatal OR pregnan\* OR prenatal

Retrieved: 10 (retained 0)

### **Additional Search Sources**

**Database: TRIP Database**

URL: <https://www.tripdatabase.com/>

Date Searched: 11 August 2016

Records Retrieved: 9

#### S1. TRIP Search

Simple search field: bacteriuria\* AND (antenatal OR pregnan\* OR prenatal)

Retrieved: 84 results in All Secondary Evidence (retained 8)

#### S2. TRIP Search

Simple search field: ("urine test" OR "urine testing" OR "urine tests" OR "urine screening") AND (antenatal OR pregnan\* OR prenatal) AND infect\*

Retrieved: 131 results in All Secondary Evidence (retained 0 – 8 duplicates from search 1)

#### S3. TRIP Search

Simple search field: (antibiotic\* OR antibacterial) AND (antenatal OR pregnan\* OR prenatal) AND prefer\*

Retrieved: 372 results in All Secondary Evidence (retained 1)

### **Additional Search Sources**

**Website: Health Quality Ontario Publications and OHTAC Recommendations**

URL: <http://www.hqontario.ca/Evidence-to-Improve-Care/Recommendations-and-Reports>

Date Searched: 11 August 2016

Records Retrieved: 0

S1. Search box search: bacteriuria

Retrieved: 4 results (retained 0)

S2. Search box search: (antenatal OR pregnancy OR pregnant OR prenatal) AND (urinalysis OR urine)

Retrieved: 20 results (retained 0)

S3. Search box search: (antenatal OR pregnancy OR pregnant OR prenatal) AND (antibiotic OR antibiotics OR antibacterial)

Retrieved: 23 results (retained 0)

S4. Browsed recommendations documents from 2011- 2016 (retained 0)

S5. Browsed clinical handbooks for quality based procedures (retained 0)

S6. Browsed Choosing Wisely Canada (retained 0)

S7. Browsed Special Reports from 2005 – 2016 (retained 0)

### **Additional Search Sources**

**Website: L'Institut national d'excellence en santé et en services sociaux (INESSS)**

URL: <http://www.inesss.qc.ca>

Date Searched: 11 August 2016

Records Retrieved: 0

S1. Search box search: bacteriuria

Retrieved: 0 results (retained 0)

S2. Search box search: (antenatal OR pregnancy OR pregnant OR prenatal) AND (urinalysis OR urine)

Retrieved: 2 results (retained 0)

S3. Search box search: (antenatal OR pregnancy OR pregnant OR prenatal) AND (antibiotic OR antibiotics OR antibacterial)

Retrieved: 6 results (retained 0)

S4. Browsed all publications

Retrieved: 240 (retained 0)

### **Additional Search Sources**

**Website: CADTH**

URL: <https://www.cadth.ca/>

Date Searched: 11 August 2016

Records Retrieved: 0

S1. Search box search: bacteriuria

Retrieved: 17 results (retained 0)

S2. Search box search: antenatal OR pregnancy OR pregnant OR prenatal

Retrieved: 13 results (retained 0)

S3. Search box search: antibiotic OR antibiotics OR antibacterial

Retrieved: 25 results (retained 0)

S4. Search box search: urine test pregnancy

Retrieved 67 results (retained 0)

S5. Browsed laboratory test publications

Retrieved: 46 (retained 0)

S6. Browsed Kidney/Urologic publications

Retrieved: 90 (retained 0)
