# Supplementary material for: Asymptomatic bacteriuria in pregnancy: systematic reviews of screening and treatment effectiveness and patient preferences
Source: PubMed Central journal article supplement — BMJ Open. 2019 Mar 13;9(3):e021347. doi: 10.1136/bmjopen-2017-021347 (PMC6429717; doi:10.1136/bmjopen-2017-021347), 2019-03-13
Supplement: bmjopen-2017-021347supp003.pdf [file bmjopen-2017-021347supp003.pdf]

### Supplement 3. Eligibility criteria for screening effectiveness, women's outcome valuation, and treatment effectiveness

| Question                        | PICOTS                                                                                                                                                                                                                                                                                                                                                                                                                                                                                                                                                                                                                                                                                                                                                                                                                                                                                                                                                                                                 | Study designs;<br>Language                                                                                                                                        |
|---------------------------------|--------------------------------------------------------------------------------------------------------------------------------------------------------------------------------------------------------------------------------------------------------------------------------------------------------------------------------------------------------------------------------------------------------------------------------------------------------------------------------------------------------------------------------------------------------------------------------------------------------------------------------------------------------------------------------------------------------------------------------------------------------------------------------------------------------------------------------------------------------------------------------------------------------------------------------------------------------------------------------------------------------|-------------------------------------------------------------------------------------------------------------------------------------------------------------------|
| Benefits and harms of screening | <p><b>P:</b> Asymptomatic pregnant women at any stage of pregnancy who are not at high risk for bacteriuria</p> <p><b>I:</b> Any screening program, whereby there is an intent (i.e., clinical algorithm) for all pregnant women to receive a screening test with follow-up of screen-positive cases</p> <p><b>C:</b> No screening program (but may include indicated testing and/or treatment upon development of symptoms), or a different screening test or algorithm</p> <p><b>O*:</b> Maternal mortality (9), maternal sepsis (8), pyelonephritis (7), perinatal mortality <math>\geq 20</math> weeks' gestation (9), spontaneous abortion/pregnancy loss before 20 weeks' gestation (8), neonatal sepsis (8), preterm delivery <math>&lt; 37</math> weeks' gestation (7), low birth weight <math>&lt; 2500</math>g (6), serious maternal and neonatal harms (7)</p> <p><b>T:</b> Any timing</p> <p><b>S:</b> Any primary care or clinical setting providing antenatal care to pregnant women</p> | <p>RCTs, CCTs, controlled observational designs (i.e., prospective and retrospective cohort, case-control, controlled before-after)</p> <p>English and French</p> |
| Outcome valuation               | <p><b>P:</b> Asymptomatic pregnant women at any stage of pregnancy who are not at high risk for bacteriuria; will also accept asymptomatic women who are not pregnant if necessary</p> <p><b>I:</b> Any screening program or test, and any antibiotic; will accept studies on treatment for any bacterial condition in pregnancy</p> <p><b>C:</b> Not applicable</p> <p><b>O:</b> Several possible outcomes (e.g., relative weight/utilities of benefits and harms; willingness to be screened based on relative value placed on benefits and harms of screening programs or treatment)</p> <p><b>T:</b> Any timing</p> <p><b>S:</b> Any primary care or clinical setting providing antenatal care to pregnant women</p>                                                                                                                                                                                                                                                                               | <p>Qualitative, mixed methods, surveys/cross-sectional designs</p> <p>English and French</p>                                                                      |
| Benefits and harms of treatment | <p><b>P:</b> Asymptomatic pregnant women at any stage of pregnancy who are not at high risk for bacteriuria</p> <p><b>I:</b> Any antibiotic</p> <p><b>C:</b> No treatment or placebo</p> <p><b>O*:</b> Maternal mortality (9), maternal sepsis (8), pyelonephritis (7), perinatal mortality <math>\geq 20</math> weeks' gestation (9), spontaneous abortion/pregnancy loss before 20 weeks' gestation (8), neonatal sepsis (8), preterm delivery <math>&lt; 37</math> weeks' gestation (7), low birth weight <math>&lt; 2500</math>g (6), serious maternal and neonatal harms (7)</p>                                                                                                                                                                                                                                                                                                                                                                                                                  | <p>RCTs (or systematic review(s))</p> <p>English and French</p>                                                                                                   |

|  |                                                                                           |  |
|--|-------------------------------------------------------------------------------------------|--|
|  | <b>T:</b> Any timing                                                                      |  |
|  | <b>S:</b> Any primary care or clinical setting providing antenatal care to pregnant women |  |

CCT: controlled clinical trial; g: grams; PICOTS: populations, interventions, comparators, outcomes, timing, and setting; RCT: randomized clinical trial

\* Outcomes ratings included in brackets; these were rated as critical/important for decision-making by CTFPHC members and by women recruited for patient engagement
