# Supplementary material for: Asymptomatic bacteriuria in pregnancy: systematic reviews of screening and treatment effectiveness and patient preferences
Source: PubMed Central journal article supplement — BMJ Open. 2019 Mar 13;9(3):e021347. doi: 10.1136/bmjopen-2017-021347 (PMC6429717; doi:10.1136/bmjopen-2017-021347), 2019-03-13
Supplement: bmjopen-2017-021347supp005.pdf [file bmjopen-2017-021347supp005.pdf]

## Supplement 5. Risk of bias (ROB) assessments for included studies

Summary of ROB for studies of screening effectiveness

| First Author,<br>Year | Selection                               |                                    |                           |                                                                              |       | Comparability            |       | Outcome               |                                     |                                     |       | Total<br>Score <sup>a</sup><br>(max<br>9) | Selective<br>Outcome<br>Reporting <sup>b</sup> |
|-----------------------|-----------------------------------------|------------------------------------|---------------------------|------------------------------------------------------------------------------|-------|--------------------------|-------|-----------------------|-------------------------------------|-------------------------------------|-------|-------------------------------------------|------------------------------------------------|
|                       | Representativeness of<br>exposed cohort | Selection of non-exposed<br>cohort | Ascertainment of exposure | Outcome not present at start<br>of study (pyelonephritis/<br>other outcomes) | Total | Comparability of cohorts | Total | Assessment of outcome | Adequacy of length of follow-<br>up | Adequacy of follow-up of<br>cohorts | Total |                                           |                                                |
| Gérard, 1983          | 1                                       | 1                                  | 0                         | 0/1                                                                          | 3     | 0                        | 0     | 1                     | 1                                   | 1                                   | 3     | 6                                         | Suspected <sup>c</sup>                         |
| Gratacós, 1994        | 1                                       | 1                                  | 0                         | 0/1                                                                          | 3     | 0                        | 0     | 1                     | 1                                   | 1                                   | 3     | 6                                         | Suspected <sup>d</sup>                         |
| Rhode, 2007           | 1                                       | 1                                  | 1                         | 0/1                                                                          | 4     | 1                        | 1     | 1                     | 1                                   | 1                                   | 3     | 8                                         | Suspected <sup>e</sup>                         |
| Uncu, 2002            | 1                                       | 1                                  | 1                         | 0/1                                                                          | 4     | 0                        | 0     | 1                     | 1                                   | 0                                   | 2     | 6                                         | Not<br>suspected <sup>f</sup>                  |

<sup>a</sup>Assessed using the Newcastle-Ottawa Quality Assessment Scale<sup>31</sup>

<sup>b</sup>Assessed due to concern regarding reporting bias in the studies, but assessment not included in the total score

<sup>c</sup>Did not report on fetal abnormalities

<sup>d</sup>Did not report on spontaneous abortion, perinatal mortality, preterm delivery or fetal abnormalities

<sup>e</sup>Did not report on spontaneous abortion, perinatal mortality, or fetal abnormalities

<sup>f</sup>Reported on all outcomes, including fetal death >20 weeks of gestation (eligible for perinatal mortality)

ROB for studies of screening effectiveness

| Domain                                                                | Author's judgement | Support for judgement                                                                                                       |
|-----------------------------------------------------------------------|--------------------|-----------------------------------------------------------------------------------------------------------------------------|
| <b>Gérard, 1983 (cohort)</b>                                          |                    |                                                                                                                             |
| Representativeness of the exposed cohort                              | 1                  | Included all pregnant women who visited the clinic at <25 wks GA.                                                           |
| Selection of the non-exposed cohort                                   | 1                  | Formed retrospectively, pregnant women attending the clinic in the 10 previous months (before implementation of screening). |
| Ascertainment of exposure                                             | 0                  | Not reported.                                                                                                               |
| Outcome not present at start of study (pyelonephritis/other outcomes) | 0/1                | Not ascertained for pyelonephritis, other outcomes could not have been present at the start of the study.                   |
| Comparability of the cohorts                                          | 0                  | No evidence of comparability.                                                                                               |
| Assessment of outcome                                                 | 1                  | Appear to have used a chart review.                                                                                         |
| Adequacy of length of follow-up                                       | 1                  | Follow-up until delivery and for 3-6 months post-partum for those with ≥2 instances of asymptomatic bacteriuria.            |
| Adequacy of follow-up of cohorts                                      | 1                  | No loss to follow-up.                                                                                                       |
| Selective outcome reporting <sup>b</sup>                              | suspected          | Did not report on fetal abnormalities.                                                                                      |
| Total score (maximum 10)                                              | 6                  |                                                                                                                             |
| <b>Gratacós, 1944 (cohort)</b>                                        |                    |                                                                                                                             |
| Representativeness of the exposed cohort                              | 1                  | All pregnant women presenting to the clinic at <25 wks GA between January 1991 and December 1992.                           |
| Selection of the non-exposed cohort                                   | 1                  | Women who visited the same clinic in years (January 1987 to December 1990) before implementation of the screening program.  |
| Ascertainment of exposure                                             | 0                  | Not reported.                                                                                                               |
| Outcome not present at start of study (pyelonephritis/other outcomes) | 0/1                | Not ascertained for pyelonephritis, other outcomes could not have been present at the start of the study.                   |
| Comparability of the cohorts                                          | 0                  | No evidence of comparability.                                                                                               |
| Assessment of outcome                                                 | 1                  | Used a chart review – ‘was recorded for 6 years’.                                                                           |
| Adequacy of length of follow-up                                       | 1                  | Followed-up until delivery.                                                                                                 |
| Adequacy of follow-up of cohorts                                      | 1                  | 10 (6.9%) lost to follow-up.                                                                                                |
| Selective outcome reporting <sup>b</sup>                              | suspected          | Did not report on spontaneous abortion, perinatal mortality, preterm delivery or fetal abnormalities.                       |
| Total score (maximum 10)                                              | 6                  |                                                                                                                             |
| <b>Rhode, 2007 (cohort)</b>                                           |                    |                                                                                                                             |
| Representativeness of the exposed cohort                              | 1                  | All pregnant women who enrolled for care and delivered after August 15, 2002.                                               |
| Selection of the non-exposed cohort                                   | 1                  | All pregnant women who enrolled for care at the same practice and delivered before August 15, 2002.                         |

| Domain                                                                | Author's judgement | Support for judgement                                                                                     |
|-----------------------------------------------------------------------|--------------------|-----------------------------------------------------------------------------------------------------------|
| Ascertainment of exposure                                             | 1                  | Used delivery records.                                                                                    |
| Outcome not present at start of study (pyelonephritis/other outcomes) | 0/1                | Not ascertained for pyelonephritis, other outcomes could not have been present at the start of the study. |
| Comparability of the cohorts                                          | 1                  | Compared 10 demographic factors, showing that groups were similar.                                        |
| Assessment of outcome                                                 | 1                  | Used a chart review.                                                                                      |
| Adequacy of length of follow-up                                       | 1                  | Followed-up until delivery of the patient left the practice.                                              |
| Adequacy of follow-up of cohorts                                      | 1                  | 112 (4.6%) lost to follow-up.                                                                             |
| Selective outcome reporting <sup>b</sup>                              | suspected          | Did not report on spontaneous abortion, perinatal mortality or fetal abnormalities.                       |
| Total score (maximum 10)                                              | 8                  |                                                                                                           |
| <b>Uncu, 2002 (cohort)</b>                                            |                    |                                                                                                           |
| Representativeness of the exposed cohort                              | 1                  | All pregnant women <32 wks GA seen at an antenatal outpatient clinic.                                     |
| Selection of the non-exposed cohort                                   | 1                  | Women who visited the clinic prior to the start of the screening study.                                   |
| Ascertainment of exposure                                             | 1                  | Used delivery records.                                                                                    |
| Outcome not present at start of study (pyelonephritis/other outcomes) | 0/1                | Not ascertained for pyelonephritis, other outcomes could not have been present at the start of the study. |
| Comparability of the cohorts                                          | 0                  | No evidence of comparability.                                                                             |
| Assessment of outcome                                                 | 1                  | Used delivery records.                                                                                    |
| Adequacy of length of follow-up                                       | 1                  | Follow-up until post-delivery.                                                                            |
| Adequacy of follow-up of cohorts                                      | 0                  | Not reported.                                                                                             |
| Selective outcome reporting <sup>b</sup>                              | not suspected      | Reported on all outcomes, including fetal death >20 wks GA (eligible for perinatal mortality).            |
| Total score (maximum 10)                                              | 6                  |                                                                                                           |

GA: gestational age; wks: weeks

<sup>a</sup>Assessed using the Newcastle-Ottawa Quality Assessment Scale

<sup>b</sup>Assessed due to concern regarding reporting bias in the studies, but assessment not included in the total score

Summary of ROB for studies of women's outcome valuation

| First Author, Year | Did the study address a clearly focused question / issue? | Is the research method (study design) appropriate for answering the research question? | Is the method of selection of the subjects clearly described? | Could the way the sample was obtained introduce bias? | Was the sample of subjects representative of the population to which the findings will be referred? | Was the sample size based on pre-study considerations of statistical power? | Was a satisfactory response rate achieved? | Are the measurements (questionnaires) likely to be valid and reliable? | Was the statistical significance assessed? | Are confidence intervals given for the main results? | Could there be confounding factors that haven't been accounted for? | Can the results be applied to your organization? |
|--------------------|-----------------------------------------------------------|----------------------------------------------------------------------------------------|---------------------------------------------------------------|-------------------------------------------------------|-----------------------------------------------------------------------------------------------------|-----------------------------------------------------------------------------|--------------------------------------------|------------------------------------------------------------------------|--------------------------------------------|------------------------------------------------------|---------------------------------------------------------------------|--------------------------------------------------|
| Butters, 1990      | 1                                                         | 1                                                                                      | 1                                                             | 2                                                     | 1                                                                                                   | 2                                                                           | 1                                          | 2                                                                      | 1                                          | 3                                                    | 1                                                                   | 1                                                |
| Kazemier, 2015     | 2                                                         | 2                                                                                      | 1                                                             | 3                                                     | 1                                                                                                   | 2                                                                           | 2                                          | 2                                                                      | 3                                          | 3                                                    | 2                                                                   | 3                                                |
| Lupattelli, 2014   | 1                                                         | 1                                                                                      | 1                                                             | 1                                                     | 1                                                                                                   | 2                                                                           | 2                                          | 2                                                                      | 1                                          | 1                                                    | 3                                                                   | 1                                                |
| Mashayekhi, 2009   | 1                                                         | 1                                                                                      | 1                                                             | 1                                                     | 1                                                                                                   | 2                                                                           | 2                                          | 2                                                                      | 1                                          | 3                                                    | 1                                                                   | 1                                                |
| Nordeng, 2010      | 1                                                         | 1                                                                                      | 1                                                             | 1                                                     | 1                                                                                                   | 2                                                                           | 2                                          | 2                                                                      | 1                                          | 3                                                    | 2                                                                   | 1                                                |
| Sanz, 2000         | 1                                                         | 1                                                                                      | 3                                                             | 2                                                     | 1                                                                                                   | 2                                                                           | 2                                          | 2                                                                      | 1                                          | 3                                                    | 1                                                                   | 1                                                |
| Sharma, 2006       | 1                                                         | 1                                                                                      | 3                                                             | 2                                                     | 1                                                                                                   | 2                                                                           | 2                                          | 1                                                                      | 1                                          | 3                                                    | 1                                                                   | 1                                                |
| Twigg, 2016        | 1                                                         | 1                                                                                      | 1                                                             | 1                                                     | 1                                                                                                   | 2                                                                           | 2                                          | 1                                                                      | 1                                          | 3                                                    | 1                                                                   | 1                                                |

<sup>a</sup>Assessed using a tool developed by the Center for Evidence-based Management<sup>32</sup> for cross-sectional studies (surveys)

1=Yes, 2=Can't Tell, 3=No

ROB for studies of women's outcome valuation

| Domain                                                                                                                                                           | Author's judgement* | Support for judgement                                                                                                                                                                                                                                                                                                     |
|------------------------------------------------------------------------------------------------------------------------------------------------------------------|---------------------|---------------------------------------------------------------------------------------------------------------------------------------------------------------------------------------------------------------------------------------------------------------------------------------------------------------------------|
| <b>Butters, 1990 (cross-sectional survey)</b>                                                                                                                    |                     |                                                                                                                                                                                                                                                                                                                           |
| Clearly focused question/issue                                                                                                                                   | 1                   | Awareness of the effects of commonly used drugs, cigarettes and alcohol on the fetus                                                                                                                                                                                                                                      |
| Appropriate research method (study design)                                                                                                                       | 1                   | Cross-sectional survey of women in postnatal wards                                                                                                                                                                                                                                                                        |
| Selection of subjects clearly described                                                                                                                          | 1                   | Provides inclusion and exclusion criteria, outlines selection methods                                                                                                                                                                                                                                                     |
| Sampling method introduces bias                                                                                                                                  | 2                   | Sampling was not random, may be consecutive                                                                                                                                                                                                                                                                               |
| Sample of subjects representative of the population                                                                                                              | 1                   | Included women who were recently post-partum                                                                                                                                                                                                                                                                              |
| Sample size based on pre-study considerations of statistical power                                                                                               | 2                   | Not reported                                                                                                                                                                                                                                                                                                              |
| Satisfactory response rate                                                                                                                                       | 1                   | Response rate was 87%                                                                                                                                                                                                                                                                                                     |
| Questionnaires are likely to be valid and reliable                                                                                                               | 2                   | Validation of survey questions was not reported                                                                                                                                                                                                                                                                           |
| Statistical significance assessed                                                                                                                                | 1                   | Chi-square analysis                                                                                                                                                                                                                                                                                                       |
| Confidence intervals for main results                                                                                                                            | 3                   | No confidence intervals reported                                                                                                                                                                                                                                                                                          |
| Confounding factors not accounted for                                                                                                                            | 1                   | Confounders were not addressed with study design or analysis                                                                                                                                                                                                                                                              |
| Applicability of the results                                                                                                                                     | 1                   | Identifies areas for further education in this population                                                                                                                                                                                                                                                                 |
| <b>Kazemier, 2015 (Prospective multi-centre screening cohort with embedded treatment RCT; valuation of outcomes obtained/reported in cross-sectional manner)</b> |                     |                                                                                                                                                                                                                                                                                                                           |
| Clearly focused question/issue                                                                                                                                   | 2                   | To assess maternal and neonatal consequences of treating and not treating asymptomatic bacteriuria in pregnancy; however, no direct examination of outcome valuation set out in protocol or study methods                                                                                                                 |
| Appropriate research method (study design)                                                                                                                       | 2                   | Appears to be cross-sectional for information regarding why eligible women did not consent to participate in treatment trial                                                                                                                                                                                              |
| Selection of subjects clearly described                                                                                                                          | 1                   | Clear inclusion and exclusion criteria for screening cohort and treatment RCT, with study flow documented                                                                                                                                                                                                                 |
| Sampling method introduces bias                                                                                                                                  | 3                   | Various clinics, hospitals and ultrasound centres in the Netherlands                                                                                                                                                                                                                                                      |
| Sample of subjects representative of the population                                                                                                              | 1                   | Women 18 years or older with singleton pregnancy without symptoms of urinary tract infection.                                                                                                                                                                                                                             |
| Sample size based on pre-study considerations of statistical power                                                                                               | 2                   | Sample size estimates reported in statistical analysis, but none specified for cross-section of women for outcome valuation                                                                                                                                                                                               |
| Satisfactory response rate                                                                                                                                       | 2                   | Authors did not report response rate specifically for cross-section of women who declined treatment. Of 255 ASB-positive women, 163 received no treatment (of whom 155 did not want treatment for specified reason), but authors do not report if those who participated in treatment trial were asked/provided reason(s) |

|                                                                    |   |                                                                                                                                                                                                                                                                                                                              |
|--------------------------------------------------------------------|---|------------------------------------------------------------------------------------------------------------------------------------------------------------------------------------------------------------------------------------------------------------------------------------------------------------------------------|
| Questionnaires are likely to be valid and reliable                 | 2 | Validation of reason(s) for dissenting not reported                                                                                                                                                                                                                                                                          |
| Statistical significance assessed                                  | 3 | Fisher's exact test for outcomes from screening cohort and treatment trial; no significance for outcome valuation data                                                                                                                                                                                                       |
| Confidence intervals for main results                              | 3 | CI's reported for outcomes from screening cohort and treatment trial; no CI's for outcome valuation data                                                                                                                                                                                                                     |
| Confounding factors not accounted for                              | 2 | Assessed confounders for outcomes from screening cohort and treatment trial, but not for outcome valuation data                                                                                                                                                                                                              |
| Applicability of the results                                       | 3 | Medication avoidance for asymptomatic conditions in pregnancy among Dutch women acknowledged by study authors to align with Dutch guidelines (not routinely screening and treating women with ASB); may be more applicable for the Netherlands but not for Canada where routine screening and treatment is standing practice |
| <b>Lupattelli, 2014 (cross-sectional survey)</b>                   |   |                                                                                                                                                                                                                                                                                                                              |
| Clearly focused question/issue                                     | 1 | Association of health literacy and risk perception                                                                                                                                                                                                                                                                           |
| Appropriate research method (study design)                         | 1 | Cross-sectional survey of pregnant women                                                                                                                                                                                                                                                                                     |
| Selection of subjects clearly described                            | 1 | Self-selection, voluntary internet survey                                                                                                                                                                                                                                                                                    |
| Sampling method introduces bias                                    | 1 | Informal sampling method – self-selection was not random or consecutive                                                                                                                                                                                                                                                      |
| Sample of subjects representative of the population                | 1 | Pregnant women with internet access                                                                                                                                                                                                                                                                                          |
| Sample size based on pre-study considerations of statistical power | 2 | Not reported                                                                                                                                                                                                                                                                                                                 |
| Satisfactory response rate                                         | 2 | Large n, no response rate reported                                                                                                                                                                                                                                                                                           |
| Questionnaires are likely to be valid and reliable                 | 2 | Validation of survey questions was not reported                                                                                                                                                                                                                                                                              |
| Statistical significance assessed                                  | 1 | Mann-Whitney U test, Spearman's rank correlation coefficient, logistic regression                                                                                                                                                                                                                                            |
| Confidence intervals for main results                              | 1 | Reported in Table 3                                                                                                                                                                                                                                                                                                          |
| Confounding factors not accounted for                              | 3 | Adjusted for confounders in statistical analysis                                                                                                                                                                                                                                                                             |
| Applicability of the results                                       | 1 | Health literacy is significantly associated with adherence to pharmacotherapy in pregnant women                                                                                                                                                                                                                              |
| <b>Mashayekhi, 2009 (cross-sectional survey)</b>                   |   |                                                                                                                                                                                                                                                                                                                              |
| Clearly focused question/issue                                     | 1 | Awareness of pregnant women on the effects of drugs during pregnancy                                                                                                                                                                                                                                                         |
| Appropriate research method (study design)                         | 1 | Cross-sectional survey of pre and postnatal women                                                                                                                                                                                                                                                                            |
| Selection of subjects clearly described                            | 1 | Reports selection methods                                                                                                                                                                                                                                                                                                    |
| Sampling method introduces bias                                    | 1 | Sampling was not random or consecutive                                                                                                                                                                                                                                                                                       |
| Sample of subjects representative of the population                | 1 | Included pre and postnatal women in hospital wards                                                                                                                                                                                                                                                                           |

|                                                                    |   |                                                                                 |
|--------------------------------------------------------------------|---|---------------------------------------------------------------------------------|
| Sample size based on pre-study considerations of statistical power | 2 | Not reported                                                                    |
| Satisfactory response rate                                         | 2 | Large n, no response rate reported                                              |
| Questionnaires are likely to be valid and reliable                 | 2 | Validation of survey questions was not reported                                 |
| Statistical significance assessed                                  | 1 | Chi-square, Student's t-test, Pearson correlations, ANOVA                       |
| Confidence intervals for main results                              | 3 | Not reported                                                                    |
| Confounding factors not accounted for                              | 1 | Confounders were not addressed with study design or analysis                    |
| Applicability of the results                                       | 1 | Identifies roles for pharmacists in education of this population                |
| <b>Nordeng, 2010 (cross-sectional survey)</b>                      |   |                                                                                 |
| Clearly focused question/issue                                     | 1 | Women's perception of risk during pregnancy                                     |
| Appropriate research method (study design)                         | 1 | Cross-sectional survey of pregnant women and mothers                            |
| Selection of subjects clearly described                            | 1 | Self-selection, voluntary internet survey                                       |
| Sampling method introduces bias                                    | 1 | Informal sampling method – self-selection was not random or consecutive         |
| Sample of subjects representative of the population                | 1 | Pregnant women and young mothers (child less than 5 years) with internet access |
| Sample size based on pre-study considerations of statistical power | 2 | Not reported                                                                    |
| Satisfactory response rate                                         | 2 | Large n, no response rate reported                                              |
| Questionnaires are likely to be valid and reliable                 | 2 | Validation of survey questions was not reported                                 |
| Statistical significance assessed                                  | 1 | Linear regression, ANOVA, Student's t-test                                      |
| Confidence intervals for main results                              | 3 | Confidence intervals were available in graph format only                        |
| Confounding factors not accounted for                              | 2 | Addressed in limitations                                                        |
| Applicability of the results                                       | 1 | Indicates women overestimate risks and more education in this area is needed.   |
| <b>Sanz, 2000 (cross-sectional)</b>                                |   |                                                                                 |
| Clearly focused question/issue                                     | 1 | Drug utilization in pregnant women                                              |
| Appropriate research method (study design)                         | 1 | Cross sectional, visual analogue scale                                          |
| Selection of subjects clearly described                            | 3 | Selection methods are not reported for all populations                          |
| Sampling method introduces bias                                    | 2 | Not reported for all populations                                                |
| Sample of subjects representative of the population                | 1 | Pregnant women attending out-patient clinic at a hospital                       |
| Sample size based on pre-study considerations of statistical power | 2 | Not reported                                                                    |
| Satisfactory response rate                                         | 2 | Small n, no response rate reported                                              |
| Questionnaires are likely to be valid and reliable                 | 2 | Validation of VAS questions was not reported                                    |
| Statistical significance assessed                                  | 1 | Mann-Whitney U, Kruskal Wallis, Chi-squared                                     |

|                                                                    |   |                                                                                                             |
|--------------------------------------------------------------------|---|-------------------------------------------------------------------------------------------------------------|
| Confidence intervals for main results                              | 3 | Only in graph format                                                                                        |
| Confounding factors not accounted for                              | 1 | Confounders were not addressed with study design or analysis                                                |
| Applicability of the results                                       | 1 | Pregnant women have high perceptions of teratogenic risk                                                    |
| <b>Sharma, 2006 (cross-sectional survey)</b>                       |   |                                                                                                             |
| Clearly focused question/issue                                     | 1 | Drug utilization in pregnant women                                                                          |
| Appropriate research method (study design)                         | 1 | Cross-sectional survey of pregnant women                                                                    |
| Selection of subjects clearly described                            | 3 | Selected from an antenatal clinic but no sampling methods                                                   |
| Sampling method introduces bias                                    | 2 | Not reported                                                                                                |
| Sample of subjects representative of the population                | 1 | Pregnant women                                                                                              |
| Sample size based on pre-study considerations of statistical power | 2 | Not reported                                                                                                |
| Satisfactory response rate                                         | 2 | Large n, no response rate reported                                                                          |
| Questionnaires are likely to be valid and reliable                 | 1 | Women's statements were confirmed through medical records when available                                    |
| Statistical significance assessed                                  | 1 | Chi-squared test                                                                                            |
| Confidence intervals for main results provided                     | 3 | Not reported                                                                                                |
| Confounding factors not accounted for                              | 1 | Confounders were not addressed with study design or analysis                                                |
| Applicability of the results                                       | 1 | Education of women of child-bearing age regarding benefits and harms of drug use during pregnancy is needed |
| <b>Twigg, 2016 (cross-sectional survey)</b>                        |   |                                                                                                             |
| Clearly focused question/issue                                     | 1 | Risk perception of medications in pregnant women and relationship with use                                  |
| Appropriate research method (study design)                         | 1 | Cross-sectional survey of pregnant women and new mothers                                                    |
| Selection of subjects clearly described                            | 1 | Self-selection, voluntary internet survey                                                                   |
| Sampling method introduces bias                                    | 1 | Informal sampling method – self-selection was not random or consecutive                                     |
| Sample of subjects representative of the population                | 1 | Pregnant women or women <1 year post-natal with internet access                                             |
| Sample size based on pre-study considerations of statistical power | 2 | Not reported                                                                                                |
| Satisfactory response rate                                         | 2 | Large n, no response rate reported                                                                          |
| Questionnaires are likely to be valid and reliable                 | 1 | Used validated BMQ-General questionnaire                                                                    |
| Statistical significance assessed                                  | 1 | Chi-square, Fisher's exact test, Mann-Whitney U, Independent t-test                                         |
| Confidence intervals for main results                              | 3 | No confidence intervals for the main results, descriptive statistics only                                   |
| Confounding factors not accounted for                              | 1 | Adjustment for confounding not reported in design or analysis                                               |



|                              |   |                                                                    |
|------------------------------|---|--------------------------------------------------------------------|
| Applicability of the results | 1 | Medication use by pregnant women is impacted by beliefs about risk |
|------------------------------|---|--------------------------------------------------------------------|

<sup>a</sup>Assessed using a tool developed by the Center for Evidence-based Management for cross-sectional studies

\* 1=Yes, 2=Can't Tell, 3=No

ANOVA: analysis of variance; ASB: asymptomatic bacteriuria; BMQ: beliefs about medicine questionnaire; n: sample size; RCT:randomized clinical trial; VAS: visual analogue scale

Summary of ROB for studies of treatment effectiveness

| Study              | Sequence Generation | Allocation Concealment | Blinding of Participants and Personnel <sup>1</sup> | Blinding of Outcome Assessors <sup>1</sup> | Incomplete Reporting <sup>2</sup> | Selective Reporting <sup>3</sup> | Other Bias <sup>4</sup> | Overall Risk of Bias* |
|--------------------|---------------------|------------------------|-----------------------------------------------------|--------------------------------------------|-----------------------------------|----------------------------------|-------------------------|-----------------------|
| Brumfitt 1975      | Yellow              | Yellow                 | Green                                               | Green                                      | Red                               | Red                              | Green                   | Red                   |
| Elder 1966         | Yellow              | Yellow                 | Green                                               | Green                                      | Green                             | Red                              | Green                   | Red                   |
| Elder 1971         | Red                 | Red                    | Yellow                                              | Yellow                                     | Yellow                            | Yellow                           | Green                   | Red                   |
| Foley 1987         | Green               | Yellow                 | Yellow                                              | Yellow                                     | Yellow                            | Red                              | Green                   | Red                   |
| Furness 1975       | Yellow              | Yellow                 | Yellow                                              | Yellow                                     | Red                               | Yellow                           | Green                   | Red                   |
| Gold 1966          | Red                 | Red                    | Yellow                                              | Yellow                                     | Green                             | Yellow                           | Green                   | Red                   |
| Kass 1960          | Red                 | Red                    | Green                                               | Yellow                                     | Yellow                            | Yellow                           | Green                   | Red                   |
| Kazemier 2015      | Green               | Green                  | Green                                               | Green                                      | Green                             | Green                            | Green                   | Green                 |
| Kincaid-Smith 1965 | Yellow              | Green                  | Green                                               | Green                                      | Yellow                            | Yellow                           | Green                   | Yellow                |
| Little 1966        | Yellow              | Yellow                 | Yellow                                              | Yellow                                     | Green                             | Yellow                           | Green                   | Yellow                |
| Mulla 1960         | Yellow              | Yellow                 | Yellow                                              | Yellow                                     | Green                             | Red                              | Green                   | Red                   |
| Pathak 1969        | Yellow              | Yellow                 | Yellow                                              | Yellow                                     | Green                             | Red                              | Green                   | Red                   |
| Thomsen 1987       | Yellow              | Yellow                 | Yellow                                              | Yellow                                     | Green                             | Yellow                           | Green                   | Yellow                |
| Williams 1969      | Yellow              | Yellow                 | Yellow                                              | Yellow                                     | Yellow                            | Red                              | Green                   | Red                   |
| Wren 1969          | Red                 | Red                    | Yellow                                              | Yellow                                     | Green                             | Yellow                           | Green                   | Red                   |

<sup>a</sup> Assessed using the Cochrane Risk of Bias<sup>34</sup> tool

<sup>1</sup> For the blinding domains, objective outcomes were considered to be at lower ROB than subjective outcomes

<sup>2</sup> For the incomplete reporting domain, 10-30% loss to follow-up were considered as Unclear ROB if no apparent between groups or reasons were provided

<sup>3</sup> For the selective reporting domain, a default of Low ROB was used for selective reporting when this was undetected or not highly suspected

<sup>4</sup> Assessed as: Low risk of bias if no other sources of bias are identified, High risk of bias if other sources of bias detected such as: participant characteristics (baseline imbalances), study design characteristics (crossover, cluster-randomized, or blocked randomization in trials without blinding); Unclear risk of bias assessment not applicable for this domain.

\* Assessed as: Low if all domains are assessed as low, Unclear if at least one domain is assessed as unclear and no domains are assessed as high, or High if at least one domain is assessed as high.

**Legend:**

- Low risk
- Unclear risk
- High risk

ROB for individual studies of treatment effectiveness

| Domain                                 | Author's judgement | Support for judgement                                                                                                                                                                                          |
|----------------------------------------|--------------------|----------------------------------------------------------------------------------------------------------------------------------------------------------------------------------------------------------------|
| <b>Brumfitt, 1975 (RCT)</b>            |                    |                                                                                                                                                                                                                |
| Random sequence generation             | Unclear            | No description of the sequence generation process, how women were assigned to treatment or placebo, unequal numbers in treatment and placebo groups.                                                           |
| Allocation concealment                 | Unclear            | No information provided to judge.                                                                                                                                                                              |
| Blinding of participants and personnel | Low                | "...were given placebo under double-blind conditions". Method not described in sufficient detail. Objective outcomes.                                                                                          |
| Blinding of outcome assessment         | Low                | "...were given placebo under double-blind conditions". Method not described in sufficient detail. Objective outcomes.                                                                                          |
| Incomplete outcome data                | High               | Inconsistencies in total number of women not explained (number of <2500g babies provided for 413/326 bacteriuric women); results not provided for pyelonephritis for all women in treated group (only subset). |
| Selective reporting                    | High               | Results not provided for pyelonephritis for all women allocated to treatment.                                                                                                                                  |
| Other bias                             | Low                | Insufficient information to judge.                                                                                                                                                                             |
| Overall risk of bias                   | High               |                                                                                                                                                                                                                |
| <b>Elder, 1966 (RCT)</b>               |                    |                                                                                                                                                                                                                |
| Random sequence generation             | Unclear            | "...a random sequence". Insufficient information to judge.                                                                                                                                                     |
| Allocation concealment                 | Unclear            | No information provided to judge.                                                                                                                                                                              |
| Blinding of participants and personnel | Low                | "...double-blind trial"; no information provided to judge. Objective outcomes.                                                                                                                                 |
| Blinding of outcome assessment         | Low                | "...double-blind trial"; no information provided to judge. Objective outcomes.                                                                                                                                 |
| Incomplete outcome data                | Low                | Information provided on women lost to follow-up, reasonably balanced between groups.                                                                                                                           |
| Selective reporting                    | High               | Result not provided for pyelonephritis for all participants; no pregnancy outcomes (GA, birthweight).                                                                                                          |
| Other bias                             | Low                | Insufficient information to judge.                                                                                                                                                                             |
| Overall risk of bias                   | High               |                                                                                                                                                                                                                |
| <b>Elder, 1971 (CCT)</b>               |                    |                                                                                                                                                                                                                |
| Random sequence generation             | High               | "...alternate bacteriuric...were assigned."                                                                                                                                                                    |
| Allocation concealment                 | High               | Participants were allocated by alternation.                                                                                                                                                                    |
| Blinding of participants and personnel | Unclear            | "identical-appearing placebo"; insufficient information to judge.                                                                                                                                              |
| Blinding of outcome assessment         | Unclear            | "identical-appearing placebo"; insufficient information to judge.                                                                                                                                              |
| Incomplete outcome data                | Unclear            | Insufficient information to judge.                                                                                                                                                                             |
| Selective reporting                    | Unclear            | Unable to judge; twin deliveries were excluded.                                                                                                                                                                |
| Other bias                             | Low                | Insufficient information to judge.                                                                                                                                                                             |
| Overall risk of bias                   | High               |                                                                                                                                                                                                                |
| <b>Foley, 1987</b>                     |                    |                                                                                                                                                                                                                |

| Domain                                 | Author's judgement | Support for judgement                                                                                                                                                 |
|----------------------------------------|--------------------|-----------------------------------------------------------------------------------------------------------------------------------------------------------------------|
| Random sequence generation             | Low                | Allocated to treatment or no treatment by "toss of a coin".                                                                                                           |
| Allocation concealment                 | Unclear            | No information to judge.                                                                                                                                              |
| Blinding of participants and personnel | Unclear            | No description of any attempt at blinding; not placebo-controlled. Objective outcomes.                                                                                |
| Blinding of outcome assessment         | Unclear            | No description of any attempt at blinding; not placebo-controlled. Objective outcomes.                                                                                |
| Incomplete outcome data                | Unclear            | Loss to follow-up: 19%; no reasons provided for missing outcome data.                                                                                                 |
| Selective reporting                    | High               | No pregnancy outcomes (GA, birthweight).                                                                                                                              |
| Other bias                             | Low                | Insufficient information to judge.                                                                                                                                    |
| Overall risk of bias                   | High               |                                                                                                                                                                       |
| <b>Furness, 1975 (RCT)</b>             |                    |                                                                                                                                                                       |
| Random sequence generation             | Unclear            | "by random allocation"; no additional information to judge.                                                                                                           |
| Allocation concealment                 | Unclear            | No information to judge.                                                                                                                                              |
| Blinding of participants and personnel | Unclear            | Not placebo-controlled. Objective outcomes.                                                                                                                           |
| Blinding of outcome assessment         | Unclear            | No information to judge.                                                                                                                                              |
| Incomplete outcome data                | High               | 20/226 women withdrawn from trial, no details provided. All women included in outcome of pyelonephritis, 17% loss to follow-up or low birthweight and GA at delivery. |
| Selective reporting                    | Unclear            | Unable to separate incidence of pyelonephritis during pregnancy and puerperium; results combined.                                                                     |
| Other bias                             | Low                | Insufficient information to judge.                                                                                                                                    |
| Overall risk of bias                   | High               |                                                                                                                                                                       |
| <b>Gold, 1966 (CCT)</b>                |                    |                                                                                                                                                                       |
| Random sequence generation             | High               | Women allocated to treatment based on study number: odd number treatment, even number control.                                                                        |
| Allocation concealment                 | High               | Allocated to treatment based on study number.                                                                                                                         |
| Blinding of participants and personnel | Unclear            | Placebo-controlled; no further details provided. Objective outcomes.                                                                                                  |
| Blinding of outcome assessment         | Unclear            | No information to judge. Objective outcomes.                                                                                                                          |
| Incomplete outcome data                | Low                | Does not appear to be any loss to follow-up.                                                                                                                          |
| Selective reporting                    | Unclear            | No definition provided for prematurity.                                                                                                                               |
| Other bias                             | Low                | Insufficient information to judge.                                                                                                                                    |
| Overall risk of bias                   | High               |                                                                                                                                                                       |
| <b>Kass, 1960 (CCT)</b>                |                    |                                                                                                                                                                       |
| Random sequence generation             | High               | "alternate women received a placebo".                                                                                                                                 |
| Allocation concealment                 | High               | Allocation based on alternation: "alternate women received a placebo".                                                                                                |

| Domain                                 | Author's judgement | Support for judgement                                                                                                                                                                                                                                                                                                                                                                                                     |
|----------------------------------------|--------------------|---------------------------------------------------------------------------------------------------------------------------------------------------------------------------------------------------------------------------------------------------------------------------------------------------------------------------------------------------------------------------------------------------------------------------|
| Blinding of participants and personnel | Low                | Placebo was used and "the nature of the treatment was not known to the patient or to the attending obstetrical staff".                                                                                                                                                                                                                                                                                                    |
| Blinding of outcome assessment         | Unclear            | Although a placebo was used, no further details are provided on blinding of outcome assessment. Objective outcomes.                                                                                                                                                                                                                                                                                                       |
| Incomplete outcome data                | Unclear            | 40 (21%) women were not enrolled either because they were >32 weeks GA before treatment could be started (n=30), or already received treatment for symptomatic infection (n=10). Loss to follow-up: 23 (11%) for pyelonephritis and low birthweight, no details provided; 69 (34%) for long-term persistent bacteriuria.                                                                                                  |
| Selective reporting                    | Unclear            | 3 women had subsequent pregnancy and were reassigned to their original treatment group included in the analysis. In 5 placebo patients, symptomatic disease was assumed but no symptoms were documented. Not all women in symptomatic group were confirmed to have fever. Women treated for infections other than that in the urinary tract were included in the symptomatic group if they had cleared their bacteriuria. |
| Other bias                             | Low                | Insufficient information to judge.                                                                                                                                                                                                                                                                                                                                                                                        |
| Overall risk of bias                   | High               |                                                                                                                                                                                                                                                                                                                                                                                                                           |
| <b>Kazemier, 2015 (RCT)</b>            |                    |                                                                                                                                                                                                                                                                                                                                                                                                                           |
| Random sequence generation             | Low                | Random assignment in 1:1 ratio; computer-generated list with random block sizes of 2/4/6 participants.                                                                                                                                                                                                                                                                                                                    |
| Allocation concealment                 | Low                | Women, treating physicians and researchers remained unaware of bacteriuria status and treatment allocation. Central allocation - unmasking of treatment allocation was possible by 24h telephone service.                                                                                                                                                                                                                 |
| Blinding of participants and personnel | Low                | Double-blinded. Women, treating physicians and researchers remained unaware of bacteriuria status and treatment allocation. Objective outcomes.                                                                                                                                                                                                                                                                           |
| Blinding of outcome assessment         | Low                | Outcomes recorded by participants on questionnaires, and from data provided by hospitals and midwives up to 6 weeks post-delivery.                                                                                                                                                                                                                                                                                        |
| Incomplete outcome data                | Low                | ITT and dropout rate <10% (12/255 ASB-positive)                                                                                                                                                                                                                                                                                                                                                                           |
| Selective reporting                    | Low                | Cost-effectiveness was outlined in protocol but not reported in final study methods or results.                                                                                                                                                                                                                                                                                                                           |
| Other bias                             | Low                | No other sources of bias identified.                                                                                                                                                                                                                                                                                                                                                                                      |
| Overall risk of bias                   | Low                |                                                                                                                                                                                                                                                                                                                                                                                                                           |
| <b>Kincaid-Smith, 1965 (RCT)</b>       |                    |                                                                                                                                                                                                                                                                                                                                                                                                                           |
| Random sequence generation             | Unclear            | No description of sequence generation process.                                                                                                                                                                                                                                                                                                                                                                            |
| Allocation concealment                 | Low                | "a code of instructions to the pharmacist ensured that the trial remained double-blind despite...alterations in therapeutic regimen".                                                                                                                                                                                                                                                                                     |
| Blinding of participants and personnel | Low                | "a code of instructions to the pharmacist ensured that the trial remained double-blind despite...alterations in therapeutic regimen".                                                                                                                                                                                                                                                                                     |
| Blinding of outcome assessment         | Low                | "a code of instructions to the pharmacist ensured that the trial remained double-blind despite...alterations in therapeutic regimen".                                                                                                                                                                                                                                                                                     |
| Incomplete outcome data                | Unclear            | 240 women initially identified as bacteriuric; no information available on 55 (23%) women randomized to treatment but not included in the analysis because of poor compliance (attended infrequently or failed to take tablets continuously).                                                                                                                                                                             |
| Selective reporting                    | Unclear            | Insufficient information to judge.                                                                                                                                                                                                                                                                                                                                                                                        |

| Domain                                 | Author's judgement | Support for judgement                                                                                                                                                                                                                         |
|----------------------------------------|--------------------|-----------------------------------------------------------------------------------------------------------------------------------------------------------------------------------------------------------------------------------------------|
| Other bias                             | Low                | Insufficient information to judge.                                                                                                                                                                                                            |
| Overall risk of bias                   | Unclear            |                                                                                                                                                                                                                                               |
| <b>Little, 1966 (RCT)</b>              |                    |                                                                                                                                                                                                                                               |
| Random sequence generation             | Unclear            | No information to judge.                                                                                                                                                                                                                      |
| Allocation concealment                 | Unclear            | Allocation to treatment or control was drawn for "a pool of sealed envelopes containing a slip of paper", but there was no information provided to ensure appropriate safeguards to prevent investigators being aware of the treatment group. |
| Blinding of participants and personnel | Unclear            | Participants in the control group "were given placebo"; no further details provided. Objective outcomes.                                                                                                                                      |
| Blinding of outcome assessment         | Unclear            | No information to judge. Objective outcomes.                                                                                                                                                                                                  |
| Incomplete outcome data                | Low                | No missing outcome data.                                                                                                                                                                                                                      |
| Selective reporting                    | Unclear            | Insufficient information to judge.                                                                                                                                                                                                            |
| Other bias                             | Low                | Insufficient information to judge.                                                                                                                                                                                                            |
| Overall risk of bias                   | Unclear            |                                                                                                                                                                                                                                               |
| <b>Mulla, 1960 (RCT)</b>               |                    |                                                                                                                                                                                                                                               |
| Random sequence generation             | Unclear            | No description of sequence generation process.                                                                                                                                                                                                |
| Allocation concealment                 | Unclear            | Women were "randomly divided into two groups"; no other details provided                                                                                                                                                                      |
| Blinding of participants and personnel | Unclear            | Not placebo-controlled. Objective outcomes.                                                                                                                                                                                                   |
| Blinding of outcome assessment         | Unclear            | No information to judge. Objective outcomes.                                                                                                                                                                                                  |
| Incomplete outcome data                | Low                | No missing outcome data.                                                                                                                                                                                                                      |
| Selective reporting                    | High               | No definition for outcome of cystopyelitis; no pregnancy outcomes (GA, birthweight).                                                                                                                                                          |
| Other bias                             | Low                | Insufficient information to judge.                                                                                                                                                                                                            |
| Overall risk of bias                   | High               |                                                                                                                                                                                                                                               |
| <b>Pathak, 1969 (RCT)</b>              |                    |                                                                                                                                                                                                                                               |
| Random sequence generation             | Unclear            | "on a random basis". Insufficient information provided to permit further judgement.                                                                                                                                                           |
| Allocation concealment                 | Unclear            | Method of concealment not described.                                                                                                                                                                                                          |
| Blinding of participants and personnel | Unclear            | No information to judge.                                                                                                                                                                                                                      |
| Blinding of outcome assessment         | Unclear            | No information to judge.                                                                                                                                                                                                                      |
| Incomplete outcome data                | Low                | Missing outcome data balanced; reasons similar and unlikely to have introduced bias.                                                                                                                                                          |
| Selective reporting                    | High               | No pregnancy outcomes (GA, birthweight).                                                                                                                                                                                                      |
| Other bias                             | Low                | Insufficient information to judge.                                                                                                                                                                                                            |
| Overall risk of bias                   | High               |                                                                                                                                                                                                                                               |
| <b>Thomsen, 1987 (RCT)</b>             |                    |                                                                                                                                                                                                                                               |

| Domain                                 | Author's judgement | Support for judgement                                                                                                                                                                                                                                   |
|----------------------------------------|--------------------|---------------------------------------------------------------------------------------------------------------------------------------------------------------------------------------------------------------------------------------------------------|
| Random sequence generation             | Unclear            | Described as "randomly allocated" but no description of the sequence generation process.                                                                                                                                                                |
| Allocation concealment                 | Unclear            | Method of concealment of allocation not described.                                                                                                                                                                                                      |
| Blinding of participants and personnel | Unclear            | Placebo-controlled, described as "double-blinded" but no additional data. Objective outcomes.                                                                                                                                                           |
| Blinding of outcome assessment         | Unclear            | Described as "double-blinded" but no specific information provided to ensure outcome assessment was blinded. Objective outcomes.                                                                                                                        |
| Incomplete outcome data                | Low                | No missing outcome data.                                                                                                                                                                                                                                |
| Selective reporting                    | Unclear            | Insufficient information to judge.                                                                                                                                                                                                                      |
| Other bias                             | Low                | Insufficient information to judge.                                                                                                                                                                                                                      |
| Overall risk of bias                   | Unclear            |                                                                                                                                                                                                                                                         |
| <b>Williams, 1969 (RCT)</b>            |                    |                                                                                                                                                                                                                                                         |
| Random sequence generation             | Unclear            | "allocation at random"; no additional information to judge.                                                                                                                                                                                             |
| Allocation concealment                 | Unclear            | No information to judge.                                                                                                                                                                                                                                |
| Blinding of participants and personnel | Unclear            | No blinding, outcome may have been influenced by lack of blinding. No treatment group was given antibiotics to take if symptoms of infection developed. Objective outcomes.                                                                             |
| Blinding of outcome assessment         | Unclear            | No blinding; assessment of outcome (pyelonephritis) may have been influenced by knowledge of treatment allocation. Objective outcomes.                                                                                                                  |
| Incomplete outcome data                | Unclear            | No explanation for unequal group sizes; no information provided on any missing data. An unknown number of women in the control group were given antibiotic treatment if they developed symptoms of UTI.                                                 |
| Selective reporting                    | High               | No pregnancy outcomes (GA, birthweight).                                                                                                                                                                                                                |
| Other bias                             | Low                | Insufficient information to judge.                                                                                                                                                                                                                      |
| Overall risk of bias                   | High               |                                                                                                                                                                                                                                                         |
| <b>Wren, 1969 (CCT)</b>                |                    |                                                                                                                                                                                                                                                         |
| Random sequence generation             | High               | Women "were divided into two groups, alternate patients being treated".                                                                                                                                                                                 |
| Allocation concealment                 | High               | Women "were divided into two groups, alternate patients being treated".                                                                                                                                                                                 |
| Blinding of participants and personnel | Unclear            | No blinding; knowledge of treatment group may have influenced outcome; women in untreated group who developed clinical UTI (33/90) were given antibiotics at the choice of the obstetrician, continued to delivery in 50% of cases. Objective outcomes. |
| Blinding of outcome assessment         | Unclear            | No blinding; however, outcome of birthweight unlikely to be influenced by lack of blinding.                                                                                                                                                             |
| Incomplete outcome data                | Low                | 10 (6%) women not included in outcomes: 2 sets of twins excluded, 6 moved and 2 could not be traced, 3 delivered before antibiotics could be started, 1 refused treatment.                                                                              |
| Selective reporting                    | Unclear            | Insufficient information to judge; outcome of pyelonephritis not reported.                                                                                                                                                                              |
| Other bias                             | Low                | Insufficient information to judge.                                                                                                                                                                                                                      |
| Overall risk of bias                   | High               |                                                                                                                                                                                                                                                         |

<sup>a</sup>Assessed using the Cochrane Risk of Bias tool

ASB: asymptomatic bacteriuria; g: gram(s); GA: gestational age; UTI: urinary tract infection
