# Supplementary material for: Asymptomatic bacteriuria in pregnancy: systematic reviews of screening and treatment effectiveness and patient preferences
Source: PubMed Central journal article supplement — BMJ Open. 2019 Mar 13;9(3):e021347. doi: 10.1136/bmjopen-2017-021347 (PMC6429717; doi:10.1136/bmjopen-2017-021347), 2019-03-13

**Supplement 7. Funnel Plot Asymmetry Test for outcome of pyelonephritis for treatment effectiveness**

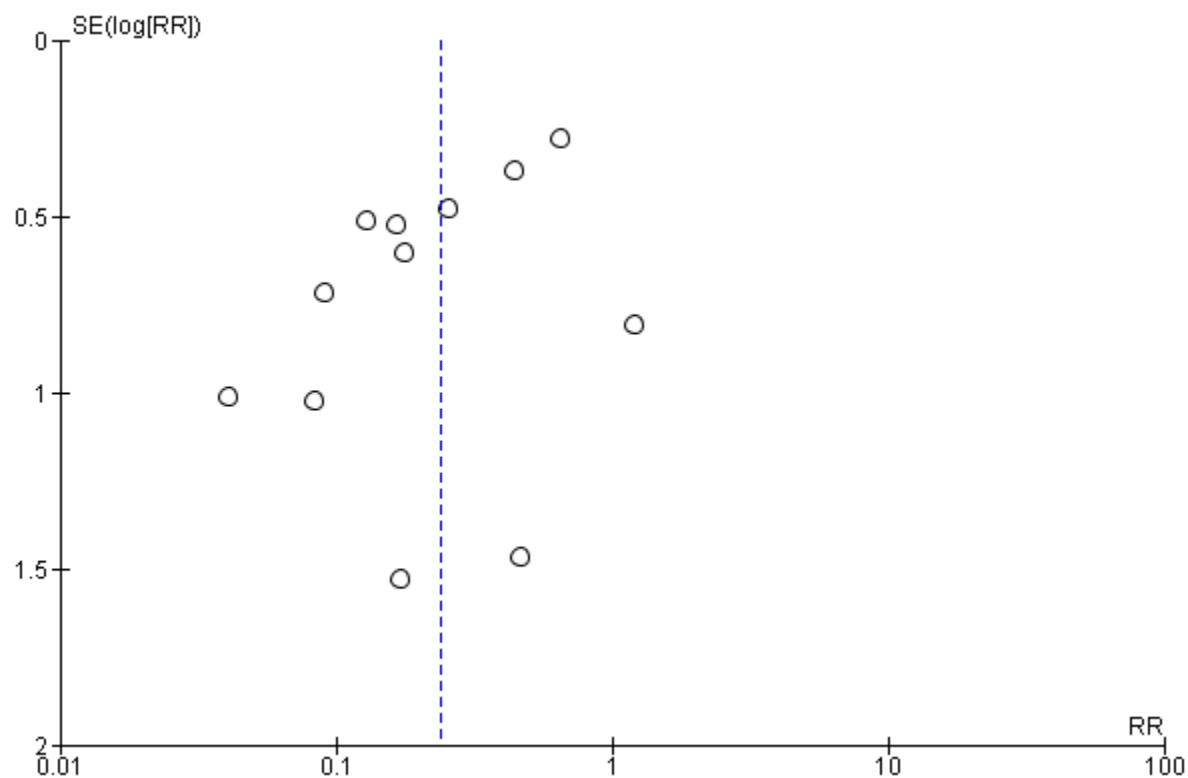

Supplement: bmjopen-2017-021347supp007.pdf [file bmjopen-2017-021347supp007.pdf]
